# Supplementary material for: Highly efficient one-pot three-component Betti reaction in water using reverse zinc oxide micelles as a recoverable and reusable catalyst
Source: Royal Society of Chemistry journal article supplement (doi:10.1039/c6ra28599f), 2017-01-01
Supplement: c6ra28599f1.pdf [file c6ra28599f1.pdf]

## Electronic Supplementary Information (ESI)

# Highly Efficient One-pot Three-component Betti Reaction in water using Reverse Zinc Oxide Micelles as Recoverable and Reusable Catalyst

Jie Mou<sup>a,b</sup>, Gan Gao<sup>a,b</sup>, Chen Chen<sup>a,b</sup>, Jie Liu<sup>a,b</sup>, Jian Gao<sup>a,b</sup>, Yi Liu<sup>a,b</sup>, Dongsheng Pei<sup>c,\*</sup>

### 1. Comparison of size distribution and TEM of reverse ZnO nanomicelles between prior to and after reaction.

The comparison of the size distributions of nanomicelles and TEM micrographs were shown in Figure 1 and Figure 2, respectively. The size distribution of nanomicelles was narrow and maintained the normal distribution between prior to and after reaction. After the reaction, the average size of the nanoparticles increased from about 116.8 to 176.0 nm. TEM images displayed clearly that most of ZnO nanomicelles was spherical. No remarkable changes occurred after reaction.

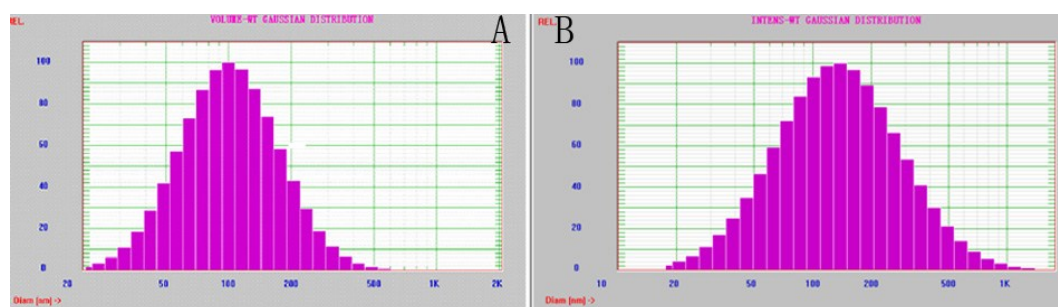

**Fig.1** Size distribution for reversed ZnO nanomicelles. (A) Prior to the reaction, average diameter is 116.8 nm; (B) After the reaction, average diameter is 176.0 nm

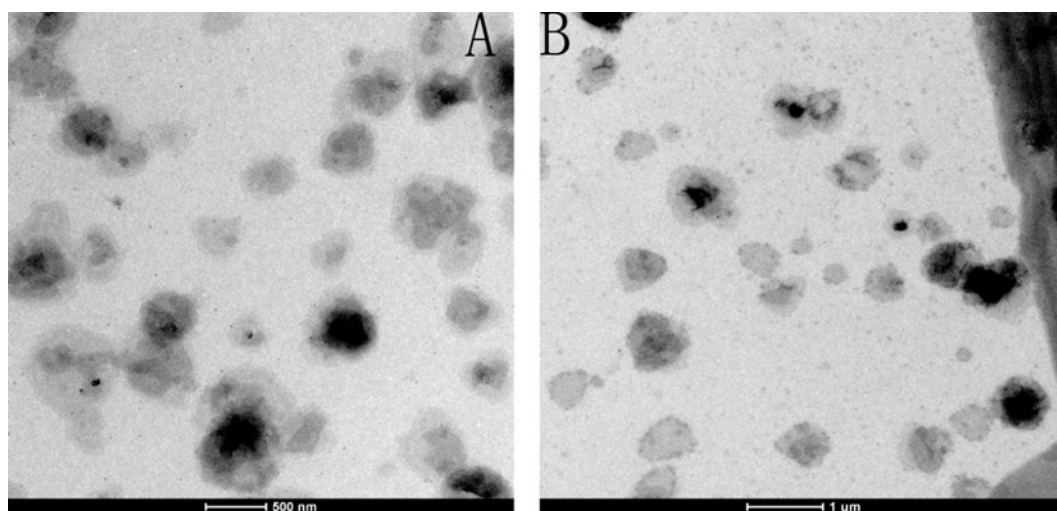

**Fig.2** TEM image of reversed ZnO nanomicelles. (A) Prior to the reactions; (B) After the reactions.

## 2. Determination of the content of Znic oxide

According to the turbidity quantitative method, the relationship of the absorbance at 660 nm and the turbidity of the standard sample at the different concentration were investigated. The standard curve was plotted in Origin 8.0 to obtain the standard curve equation (Fig. 3). The reaction was cycled for six times. The content of ZnO of every cycle was achieved from the absorbance data. The variation tendency was shown on Fig 4. The curve illustrated that the content of ZnO maintained stable.

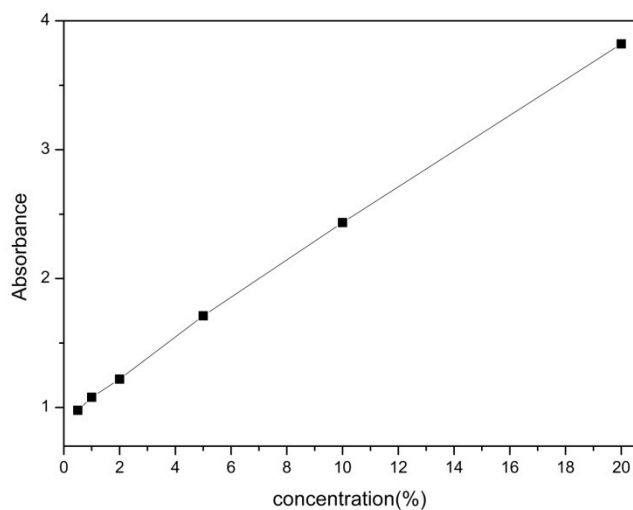

**Fig.3** Standard curve

$$Y=0.1454x+0.941 \quad R^2=0.99881$$

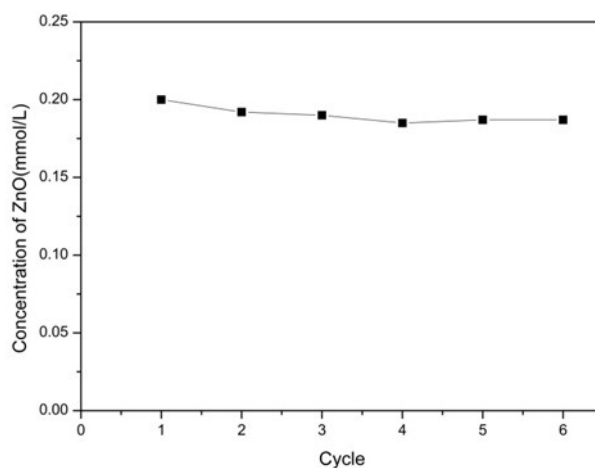

**Fig.4** The contents of ZnO in six cycle

## 3. General procedure for the preparation of Betti base derivatives 4a~4j

To a mixture of aromatic aldehydes (1 mmol),  $\beta$ -naphthol (1 mmol, 0.144 g) and benzylamine (1 mmol, 0.094 g) in 30 mL water in a round bottom flask, catalytic amount of ZnO reversed nanomicelles was added and stirred at room temperature for appropriate time. After completion of the reaction as monitored by thin layer

chromatography (TLC), the aqueous layer was decanted to recycle the catalyst for another reaction. The crude product was filtered and purified by recrystallization from ethanol (95%).

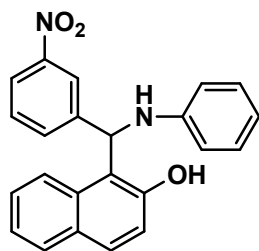

**1-((3-nitrophenyl)(phenylamino)methyl)naphthalen-2-ol (4a)** yellow solid, yield: 0.355g, 96%; mp: 152 °C(95%ethanol); IR (KBr,  $\nu$ ,  $\text{cm}^{-1}$ ): 3335.63 (s), 3092.03 (w), 2893.08 (w), 1601.28(m), 1528.37(s), 1498.62(m), 1344(m), 1231.93(m), 1216.73(m);  $^1\text{H}$  NMR (400 MHz,  $\text{CDCl}_3$ )  $\delta$  (ppm): 11.06 (s, 1H,Ar-OH), 8.39 (t,  $J = 2.0$  Hz, 1H, Ar-H), 8.16 (m, 1H, Ar-H), 7.82-7.73 (m, 4H, Ar-H), 7.51 (dd,  $J_1 = 9.1$  Hz,  $J_2 = 6.8$  Hz, 1H, Ar-H), 7.42 (m, 1H, Ar-H), 7.33 (m, 1H, Ar-H), 7.20-7.14 (m, 3H, Ar-H), 6.98-6.92 (m, 1H, Ar-H), 6.80-6.76 (m, 2H,Ar-H), 6.31 (s, 1H, N-H), 4.16 (s, 1H,- CH - );  $^{13}\text{C}$  NMR (100 MHz,  $\text{CDCl}_3$ )  $\delta$  156.2, 146.2, 143.0, 134.2, 131.3, 130.8, 130.6, 129.7, 129.4, 127.3, 123.7, 123.3, 122.3, 120.9, 120.2, 116.4, 112.9, 61.5; HRMS ( ESI )  $m/z$  [  $\text{M-H}^-$  ]: 370.4007, found: 369.1229.

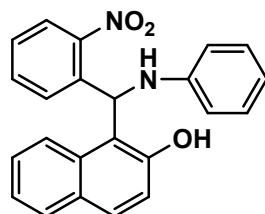

**1-((2-nitrophenyl)(phenylamino)methyl)naphthalen-2-ol (4b)** yellow solid, yield: 0.341g, 92 %; mp: 131.7-133.9 °C (95%ethanol); IR (KBr,  $\nu$ ,  $\text{cm}^{-1}$ ): 3335.02 (s), 1625.79 (w), 1597.2 (m), 1531.68 (s), 1497.49 (m), 1232.54 (m), 1218.5 (m), 813.76 (m) ;  $^1\text{H}$  NMR(400 MHz,  $\text{CDCl}_3$ )  $\delta$  (ppm):11.01 (s, 1H, Ar-OH), 8.39 (t,  $J = 2.0$  Hz, 1H, Ar-H), 8.16 (m, 1H, Ar-H), 7.79 (m, 5H,Ar-H), 7.51 (dd,  $J_1 = 9.4\text{Hz}$ ,  $J_2 = 6.5$  Hz, 1H, Ar-H), 7.42 (m, 1H, Ar-H), 7.36 - 7.29 (m, 1H, Ar-H), 7.21 - 7.11 (m, 3H, Ar-H), 6.98 - 6.91 (m, 1H, Ar -H), 6.82 - 6.74 (m, 2H, Ar-H), 6.31 (s, 1H, N-H), 4.11 (s, 1H, - CH- );  $^{13}\text{C}$  NMR (100 MHz,  $\text{CDCl}_3$ )  $\delta$  156.2, 146.2, 143.0, 134.2, 131.3, 130.8, 130.6, 129.7, 129.4, 127.3, 123.7, 123.3, 122.3, 120.9, 120.2, 116.4, 112.9, 61.5; HRMS ( ESI )  $m/z$  [  $\text{M-H}^-$  ]: 370.4007, found:369.1248.

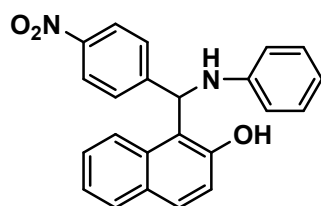

**1-((4-nitrophenyl)(phenylamino)methyl)naphthalen-2-ol (4c)** yellow solid, yield:0.352g, 95%;mp: 136.1-138.4

$^{\circ}\text{C}$ (95%ethanol); IR (KBr,  $\nu$ ,  $\text{cm}^{-1}$ ): 3333.88 (m), 1625.89 (w), 1603.52 (m), 1525.25 (s), 1500.09 (m), 1234.52 (m), 818.01 (w);  $^1\text{H}$  NMR (400 MHz,  $\text{CDCl}_3$ )  $\delta$  (ppm): 11.92 (s, 1H, Ar-OH), 8.22-8.17 (m, 2H, Ar-H), 7.41 (m, 1H, Ar-H), 7.32 (m, 1H, Ar-H), 7.20-7.12 (m, 3H, Ar-H), 6.97-6.92 (m, 1H, Ar-H), 6.82-6.76 (m, 2H, Ar-H), 6.30(s, 1H, Ar-H), 5.29 (m, 1H, N-H), 4.14 (s, 1H, -CH-);  $^{13}\text{C}$ NMR (100 MHz,  $\text{CDCl}_3$ )  $\delta$  155.9, 147.9, 146.3, 131.3, 130.8, 129.7, 129.3, 129.1, 127.3, 124.7, 123.3, 122.3, 120.9, 120.1, 116.3, 113.1, 61.5; HRMS (ESI)  $m/z$  [  $\text{M-H}^-$  ]: 370.4007, found: 369.1241.

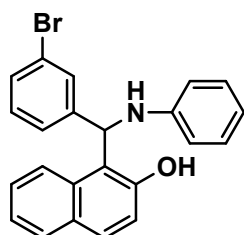

**1-((3-bromophenyl)(phenylamino)methyl)naphthalen-2-ol (4d)** brown solid, yield: 0.375g, 93 %; mp: 139.2-141.9  $^{\circ}\text{C}$  (95%ethanol); IR (KBr,  $\nu$ ,  $\text{cm}^{-1}$ ): 3334.97 (s), 2887.41 (w), 1601.03 (s), 1496.65 (m), 1229.43 (s), 744.37 (m);  $^1\text{H}$  NMR (400MHz,  $\text{CDCl}_3$ )  $\delta$  (ppm): 11.34 (s, 1H, Ar-OH), 7.82-7.72 (m, 3H, Ar-H), 7.65 (d,  $J = 1.4$  Hz, 1H, Ar-H), 7.46-7.37 (m, 3H, Ar-H), 7.35-7.28 (m, 1H, Ar-H), 7.24-7.12 (m, 4H, Ar-H), 6.93 (t,  $J = 7.4$  Hz, 1H, Ar-H), 6.76 (d,  $J = 8.2$  Hz, 2H, Ar-H), 6.14 (s, 1H, N-H), 4.13 (s, 1H, -CH-);  $^{13}\text{C}$  NMR (100 MHz,  $\text{CDCl}_3$ )  $\delta$ : 156.3, 146.5, 143.2, 131.9, 131.4, 131.1, 131.1, 130.4, 129.6, 129.2, 127.1, 126.8, 123.5, 123.1, 122.2, 121.3, 120.2, 116.4, 113.1, 62.2; HRMS (ESI)  $m/z$  [  $\text{M-H}^-$  ]: 404.2992, found: 404.0485.

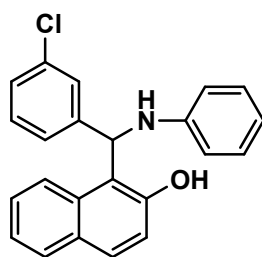

**1-((3-chlorophenyl)(phenylamino)methyl)naphthalen-2-ol (4e)** white solid, yield: 0.313g, 87 %; mp: 141.6 - 143.3  $^{\circ}\text{C}$  (95%ethanol); IR (KBr,  $\nu$ ,  $\text{cm}^{-1}$ ): 1624.74 (m), 1601.08 (s), 1498.54 (m), 1269.79 (m), 1235.61 (m), 743.92 (m);  $^1\text{H}$  NMR (400MHz,  $\text{CDCl}_3$ )  $\delta$  (ppm): 11.63 (s, 1H, Ar-OH), 7.79 (dd,  $J_1 = 8.3$ Hz,  $J_2 = 3.4$  Hz, 2H, Ar-H), 7.58 (d,  $J = 8.5$  Hz, 1H, Ar-H), 7.51 (d,  $J = 8.0$  Hz, 1H, Ar-H), 7.41-7.34 (m, 1H, Ar-H), 7.31 (d,  $J = 7.7$  Hz, 1H, Ar-H), 7.27 (dd,  $J_1 = 7.5$ Hz,  $J_2 = 1.8$  Hz, 1H, Ar-H), 7.20-7.15 (m, 3H, Ar-H), 7.15-7.13 (m, 1H, Ar-H), 7.11 (dd,  $J_1 = 7.7$ Hz,  $J_2 = 0.9$  Hz, 1H, Ar-H), 6.94 (t,  $J = 7.4$  Hz, 1H, Ar-H), 6.82 (d,  $J = 7.8$  Hz, 2H, Ar-H), 6.55 (s, 1H, -CH-), 3.99 d,  $J = 77.8$  Hz, 1H, N-H);  $^{13}\text{C}$  NMR (100 MHz,  $\text{CDCl}_3$ )  $\delta$ : 157.1, 147.0, 137.5, 133.9, 131.5, 130.3, 129.5, 129.1, 127.9, 127.2, 116.6, 112.8, 59.6; HRMS (ESI)  $m/z$  [  $\text{M-H}^-$  ]: 359.8479, found: 358.0988.

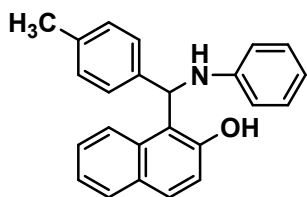

**1-((phenylamino)(p-tolyl)methyl)naphthalen-2-ol (4f)** white solid, yield: 0.282g, 83 %, mp: 133.1-135.5 °C (95%ethanol); IR (KBr,  $\nu$ ,  $\text{cm}^{-1}$ ): 3352.17(s), 2973.76 (w), 1603.48 (s), 1496.03 (m), 1230.1(s), 1466.49 (m), 1378.51(m);  $^1\text{H}$  NMR (400 MHz,  $\text{CDCl}_3$ )  $\delta$  (ppm): 11.5 (s, 1H, Ar-OH), 7.76 (dd,  $J_1 = 16.4$  Hz,  $J_2 = 8.6$  Hz, 3H, Ar-H), 7.37 (t,  $J = 9.3$  Hz, 3H, Ar-H), 7.28 (t,  $J = 7.5$  Hz, 1H, Ar-H), 7.17-7.12 (m, 5H, Ar-H), 6.91 (t,  $J = 7.4$  Hz, 1H, Ar-H), 6.76 (d,  $J = 7.9$  Hz, 2H, Ar-H), 6.14 (s, 1H, N-H), 4.13 (s, 1H, -CH-), 2.31 (s, 3H, -CH<sub>3</sub>);  $^{13}\text{C}$  NMR (100 MHz,  $\text{CDCl}_3$ )  $\delta$ : 156.2, 146.8, 138.5, 131.6, 130.1, 130.0, 129.6, 129.2, 129.1, 128.0, 126.9, 122.9, 121.9, 121.5, 120.1, 116.4, 114.0, 62.6, 21.2; HRMS (ESI)  $m/z$  [M-H<sup>-</sup>]: 339.4297, found: 338.1531.

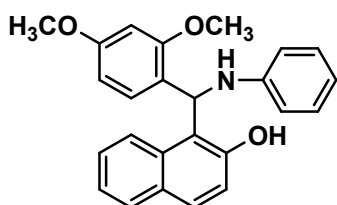

**1-((2,4-dimethoxyphenyl)(phenylamino)methyl)naphthalen-2-ol (4g)** yellow solid, yield: 0.112g, 29 % ; mp: 135.7-137.1 °C (95%ethanol);  $^1\text{H}$  NMR (400 MHz,  $\text{CDCl}_3$ )  $\delta$  8.88 (s, 1H, Ar-OH), 7.77 (t,  $J = 9.6$  Hz, 2H, Ar-H), 7.67 (d,  $J = 8.1$  Hz, 1H, Ar-H), 7.44 (dd,  $J_1 = 14.2$  Hz,  $J_2 = 7.0$  Hz, 2H, Ar-H), 7.37- 7.31 (m, 2H, Ar-H), 7.29 (s, 4H, Ar-H), 7.00 (t,  $J = 7.2$  Hz, 1H, Ar-H), 6.92 (d,  $J = 7.5$  Hz, 1H, Ar-H), 6.65 (dd,  $J_1 = 8.9$  Hz,  $J_2 = 2.3$  Hz, 1H, Ar-H), 6.53 (d,  $J = 6.2$  Hz, 1H, Ar-H), 6.49 (d,  $J = 2.3$  Hz, 1H, Ar-H), 3.91 (s, 3H, -OCH<sub>3</sub>), 3.52 (s, 3H, -OCH<sub>3</sub>);  $^{13}\text{C}$  NMR (100 MHz,  $\text{CDCl}_3$ )  $\delta$  153.6, 134.6, 129.8, 128.9, 128.7, 127.8, 126.4, 123.5, 121.1, 118.9, 117.9, 109.5, 98.1, 58.5, 55.7, 50.9; HRMS(ESI)  $m/z$ [M-H<sup>-</sup>]: 385.4551, found: 384.1573.

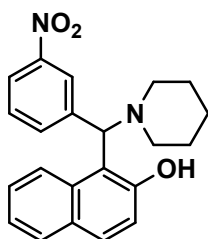

**1-((3-nitrophenyl)(piperidin-1-yl)methyl)naphthalen-2-ol (4h)** yellow solid, yield: 0.337g, 93 %, mp: 185.8-186.5 °C<sup>(1)</sup> (95%ethanol); IR (KBr,  $\nu$ ,  $\text{cm}^{-1}$ ): 3626.29 (w), 2953.47 (w), 2811.51(w), 1620.41(m), 1449.05 (m), 1343.15 (s), 1237.06 (m);  $^1\text{H}$  NMR (400 MHz,  $\text{CDCl}_3$ )  $\delta$  (ppm): 8.40 (s, 1H, Ar-OH), 8.06 (m, 1H, Ar-H), 7.93 (s, 1H, Ar-H), 7.78 (d,  $J = 8.6$  Hz, 1H, Ar-H), 7.70 (dd,  $J_1 = 15.9$  Hz,  $J_2 = 7.8$  Hz, 2H, Ar-H), 7.41 (m, 2H, Ar-H), 7.27-7.21 (m, 2H, Ar-H), 7.16 (d,  $J = 8.9$  Hz, 1H, Ar-H), 5.19 (s, 1H, -CH-), 3.34 (s, 1H, -CH<sub>2</sub>-), 2.61 (s, 1H, -CH<sub>2</sub>-), 2.08 (d,  $J = 49.1$  Hz, 2H, -CH<sub>2</sub>-), 1.65

(d,  $J = 39.6$  Hz, 6H, -CH<sub>2</sub>-), 1.40-1.14 (m, 1H, -CH<sub>2</sub>-); <sup>13</sup>C NMR (100 MHz, CDCl<sub>3</sub>)  $\delta$  155.6, 142.1, 135.1, 132.1, 130.2, 129.2, 128.8, 126.9, 124.1, 123.2, 122.8, 120.5, 120.2, 115.2, 71.3, 54.9, 26.1, 24.1; HRMS (ESI)  $m/z$  [M-H<sup>-</sup>]: 362.4218, found: 361.1544.

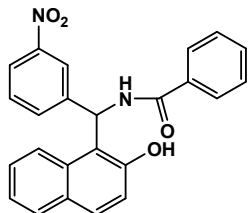

**N-((2-hydroxynaphthalen-1-yl)(3-nitrophenyl)methyl)benzamide (4i)** white solid, yield: 0.291 g, 73 %; mp: 217.7-219.5°C<sup>(2)</sup> (95 % ethanol), <sup>1</sup>H NMR (400MHz, DMSO-d<sub>6</sub>)  $\delta$  (ppm): 9.73 (s, 1H, Ar-OH), 8.63 (s, 1H, Ar-H), 7.89 (d,  $J = 8.4$  Hz, 2H, Ar-H), 7.80 - 7.71 (m, 4H, Ar-H), 7.67 (d,  $J = 8.2$  Hz, 1H, Ar-H), 7.41 (d,  $J_1 = 15.1$  Hz,  $J_2 = 8.0$  Hz, 3H, Ar-H), 7.26 (dd,  $J_1 = 15.4$  Hz,  $J_2 = 7.6$  Hz, 4H, Ar-H), 7.14 - 7.05 (m, 2H, -NH- and -CH-).

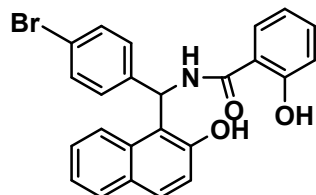

**N-((4-bromophenyl)(2-hydroxynaphthalen-1-yl)methyl)-2-hydroxybenzamide (4j)** white solid, yield: 0.318g, 71 %; mp: 181.2-183.1 °C (95 % ethanol), IR (KBr, v, cm<sup>-1</sup>): 3312.32 (w), 3127.51 (w), 1600.81 (w), 1504,17 (w), 1401.65 (s), 1228.1 (m), 1068.96 (m), 1014.96 (m), 813.09 (m); <sup>1</sup>H NMR (400 MHz, CDCl<sub>3</sub>)  $\delta$ : 11.25 (s, 1H, Ar-OH), 8.60 (s, 1H, Ar-H), 7.80 (t,  $J = 11.6$  Hz, 2H, Ar-H), 7.65 (dd,  $J_1 = 18.8$  Hz,  $J_2 = 8.4$  Hz, 1H, Ar-H), 7.57-7.52 (m, 2H, Ar-H), 7.46 (dd,  $J_1 = 15.0$  Hz,  $J_2 = 7.4$  Hz, 3H, Ar-H), 7.40 - 7.32 (m, 2H, Ar-H), 7.31-7.21 (m, 4H, Ar-H), 6.42 (s, 1H, N-H), 5.62 (s, 1H, -CH-); <sup>13</sup>C NMR (100 MHz, CDCl<sub>3</sub>)  $\delta$  161.3, 152.3, 141.6, 137.9, 132.4, 132.1, 131.5, 131.1, 129.6, 129.2, 128.9, 128.7, 128.0, 126.9, 123.6, 122.7, 121.6, 119.3, 113.8, 81.7; HRMS (ESI)  $m/z$  [M-H<sup>-</sup>]: 448.3086, found: 447.1367.

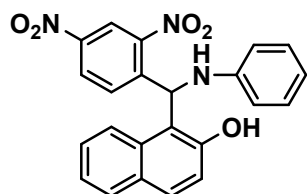

**1-((2,4-dinitrophenyl)(phenylamino)methyl)naphthalen-2-ol (4k)** yellow solid, yield: 0.219 g, 53 %; mp: 143.3 - 144.1 °C (95 % ethanol); <sup>1</sup>H NMR (400 MHz, CDCl<sub>3</sub>)  $\delta$  10.30 (s, 1H, Ar-OH), 8.46 (s, 1H, Ar-H), 7.96-7.78 (m, 3H, Ar-H), 7.51 (d,  $J = 9.1$  Hz, 1H, Ar-H), 7.47 - 7.32 (m, 4H, Ar-H), 7.24 (dd,  $J_1 = 17.3$  Hz,  $J_2 = 8.2$  Hz, 3H, Ar-H), 7.15-6.95

(m, 3H, Ar-H), 5.37 (s, 1H, Ar-H);  $^{13}\text{C}$  NMR (100 MHz,  $\text{CDCl}_3$ )  $\delta$  161.6, 155.7, 133.6, 133.2, 131.0, 128.8, 128.2, 127.9, 127.2, 123.6, 122.4, 118.5, 117.9, 110.7, 60.5; HRMS (ESI)  $m/z$  [M-H]: 415.3983, found: 414.0639.

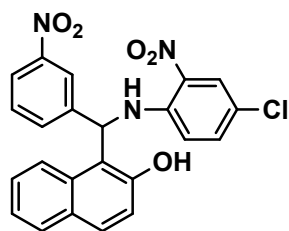

**1-(((4-chloro-2-nitrophenyl)amino)(3-nitrophenyl)methyl)naphthalen-2-ol ( 4l )** yellow solid, yield: 0.202g, 45%, mp: 150.9 - 151.8  $^{\circ}\text{C}$  (95 % ethanol); IR (KBr,  $\nu$ ,  $\text{cm}^{-1}$ ): 3322.6 (m), 1623.21 (m), 1598.18 (m), 1528.65 (s), 1470.24 (m), 1347.86 (s), 1211.58 (m), 710.94 (m);  $^1\text{H}$  NMR (400 MHz,  $\text{DMSO}-d_6$ )  $\delta$  (ppm): 10.08 (s, 1H, Ar-OH), 8.21 (s, 1H, Ar-H), 8.04-7.96 (m, 3H, Ar-H), 7.70 (dd,  $J_1 = 10.3\text{Hz}$ ,  $J_2 = 4.9\text{Hz}$ , 4H, Ar-H), 7.52 (t,  $J = 8.0\text{Hz}$ , 1H, Ar-H), 7.24 - 7.10 (m, 4H, Ar-H), 6.77 (s, 1H, N-H), 6.44 (s, 1H, -CH-);  $^{13}\text{C}$  NMR (100 MHz,  $\text{DMSO}-d_6$ )  $\delta$  157.7, 153.4, 153.0, 137.3, 134.9, 134.1, 133.6, 130.9, 130.1, 127.7, 126.4, 125.7, 125.2, 123.4, 71.3; MS (ESI)  $m/z$  [M-H]: 449.8431, found: 448.0682.

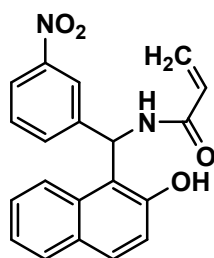

**N-((2-hydroxynaphthalen-1-yl)(3-nitrophenyl)methyl)acrylamide ( 4m )** brown solid, yield: 0.056 g, 16 %; mp: 119.2-121.2  $^{\circ}\text{C}$  ( 253 - 254  $^{\circ}\text{C}^{(3)}$ ) (95 % ethanol); IR (KBr,  $\nu$ ,  $\text{cm}^{-1}$ ): 3229.05 (m), 3107.44 (m), 1624.27 (m), 1596.4 (m), 1529.51 (s), 1462.62 (m), 1404.1 (m), 1283.64 (m), 1206.22 (m), 1013.92 (m), 913.59 (w);  $^1\text{H}$  NMR (400 MHz,  $\text{DMSO}-d_6$ )  $\delta$  (ppm): 10.06 (s, 1H, Ar-OH), 8.22 (s, 1H, Ar-H), 8.00 (dd,  $J_1 = 8.2\text{Hz}$ ,  $J_2 = 2.6\text{Hz}$ , 3H, Ar-H), 7.70 (m, 4H, Ar-H), 7.52 (t,  $J = 8.0\text{Hz}$ , 1H, Ar-H), 7.23 - 7.12 (m, 4H, Ar-H), 6.77 (s, 1H, N-H), 6.44 (s, 1H, -CH-);  $^{13}\text{C}$  NMR (100 MHz,  $\text{DMSO}-d_6$ )  $\delta$  152.9, 148.6, 148.2, 132.6, 130.1, 129.3, 128.8, 126.2, 125.4, 122.9, 121.8, 120.9, 120.4, 118.6, 100.0, 66.5.

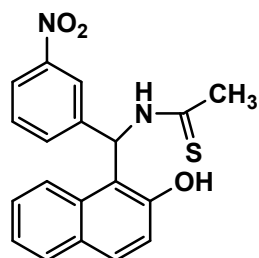

**N-((2-hydroxynaphthalen-1-yl)(3-nitrophenyl)methyl)ethanethioamide (4n)** brown solid, yield: 0.126 g, 36%; mp: 135.0 - 136.8 °C ( 234 - 236 °C<sup>(4)</sup>) (95 % ethanol); IR (KBr, v, cm<sup>-1</sup>): 2974.83 (w), 2896.7 (w), 1622.41 (m), 1606.24 (s), 1498.48 (m), 1409.48 (m), 1379.94 (m), 1312.59 (w), 1231.77 (s), 946.2 (m); <sup>1</sup>H NMR (400 MHz, CDCl<sub>3</sub>) δ ( ppm ): 11.55 ( s, 1H, Ar-OH ), 7.75 (dd, *J*<sub>1</sub> = 16.3Hz, *J*<sub>2</sub> = 8.7 Hz, 3H, Ar-H ), 7.37 ( m, 3H, Ar-H ), 7.14 ( m, 5H, Ar-H ), 6.94 - 6.88 (m, 1H, Ar-H ), 6.76 ( dd, *J*<sub>1</sub> = 8.6 Hz, *J*<sub>2</sub> = 1.0 Hz, 2H, Ar-H ), 6.13 (s, 1H, N-H ), 4.13 (s, 1H, -CH- ), 2.33 - 2.27 (m, 3H, -CH<sub>3</sub>); <sup>13</sup>C NMR (100 MHz, CDCl<sub>3</sub>) δ 156.2, 146.8, 138.5, 138.2, 131.6, 130.1, 129.5, 129.1, 128.0, 126.9, 122.9, 121.9, 121.5, 120.1, 116.4, 114.0, 62.6, 21.2.

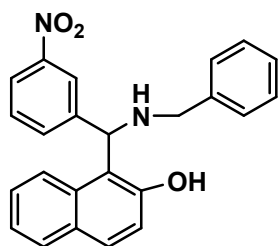

**1-((benzylamino)(3-nitrophenyl)methyl)naphthalen-2-ol (4o)** yellow solid, yield: 0.342 g, 87 %; mp: 136.1-138.4 °C (95 % ethanol); IR (KBr, v, cm<sup>-1</sup>): 3312.73 (w), 2922.98 (w), 2851.77 (w), 1703.14 (s), 1619.83 (m), 1599.01 (m), 1530.58 (s), 1239.01 (m), 813.55 (m); <sup>1</sup>H NMR (400 MHz, CDCl<sub>3</sub>) δ 10.12 (s, 1H, Ar-OH ), 8.72 (s, 1H, Ar-H ), 8.49 (d, *J* = 8.2 Hz, 1H, Ar-H ), 8.32 (s, 1H, Ar-H ), 8.24 (d, *J* = 7.6 Hz, 1H, Ar-H ), 8.08 (d, *J* = 8.2 Hz, 1H, Ar-H ), 7.70 (d, *J* = 8.6 Hz, 1H, Ar-H ), 7.43 (dd, *J*<sub>1</sub> = 13.5 Hz, *J*<sub>2</sub> = 5.7 Hz, 2H, Ar-H ), 7.41 - 7.36 (m, 3H, Ar-H ), 7.35 - 7.30 (m, 3H, Ar-H ), 7.29 - 7.23 (m, 2H, Ar-H ), 5.91 (s, 1H, N-H ), 4.12 ( m, 2H, -CH<sub>2</sub>- ), 3.88 (d, *J* = 13.0 Hz, 1H, -CH- ). <sup>13</sup>C NMR (100 MHz, CDCl<sub>3</sub>) δ 189.8, 171.2, 156.8, 148.5, 143.2, 137.5, 134.7, 134.1, 132.3, 130.7, 129.1, 128.7, 128.1, 126.9, 124.5, 123.2, 122.9, 120.6, 120.3, 112.0, 61.7, 52.7; MS (ESI) m/z [M +H<sup>+</sup>]: 384.4273, found: 383.1394.



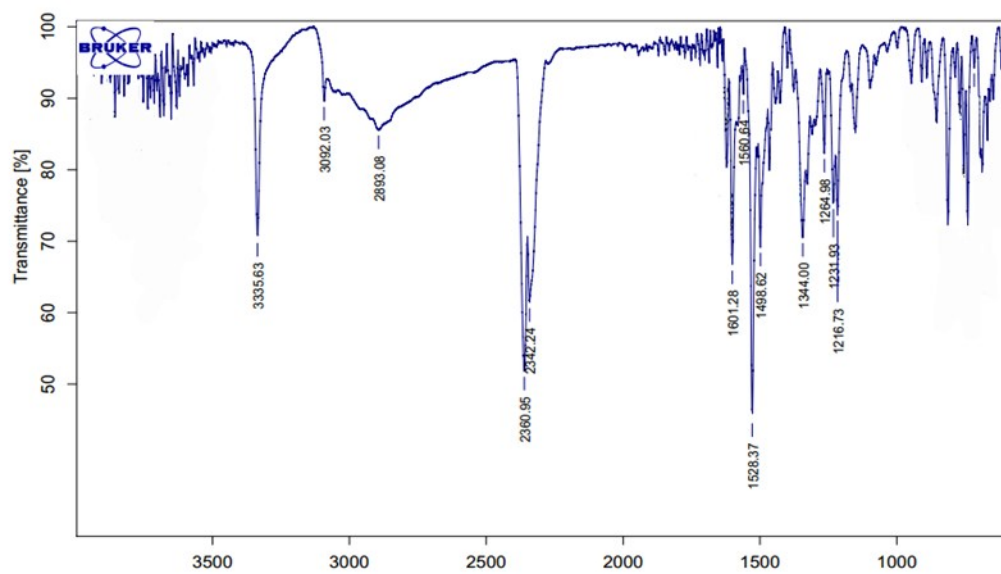

Fig. 5 IR spectrum of 4a

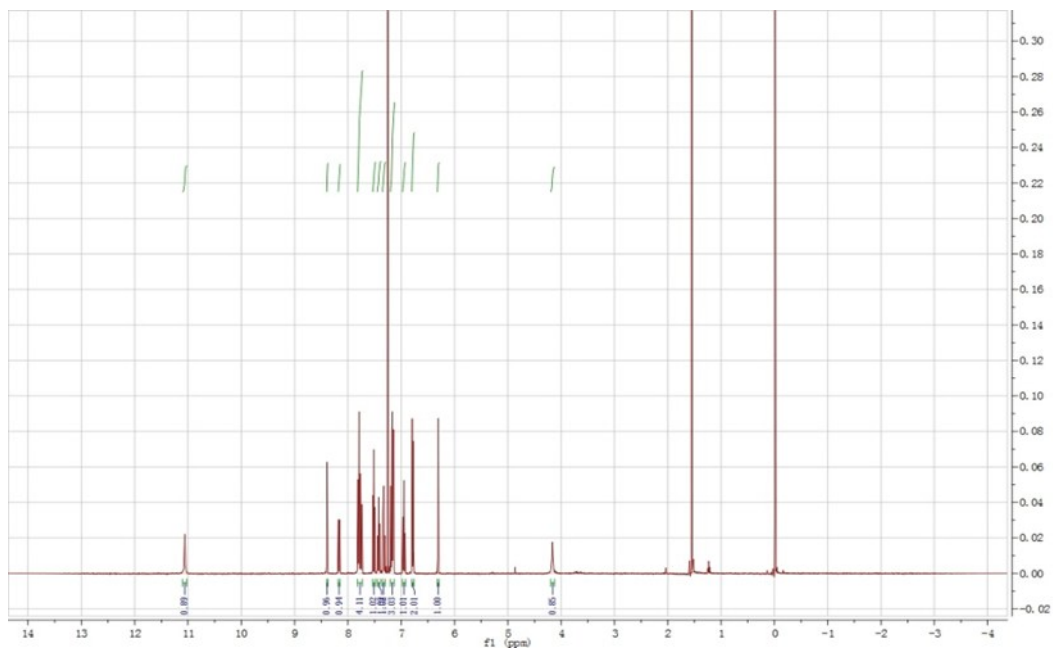

Fig. 6 <sup>1</sup>H NMR spectrum of 4a

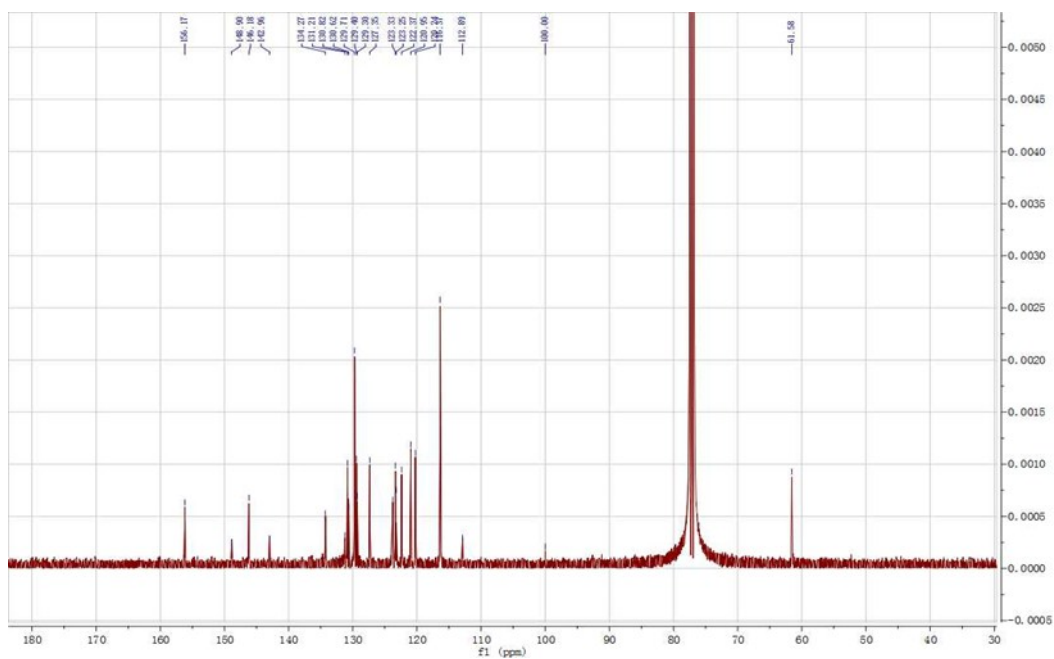

Fig. 7  $^{13}\text{C}$  NMR spectrum of 4a

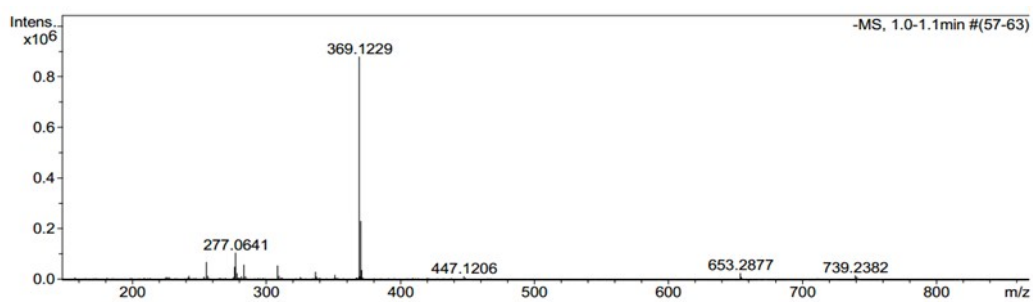

Fig. 8 HRMS spectrum of 4a

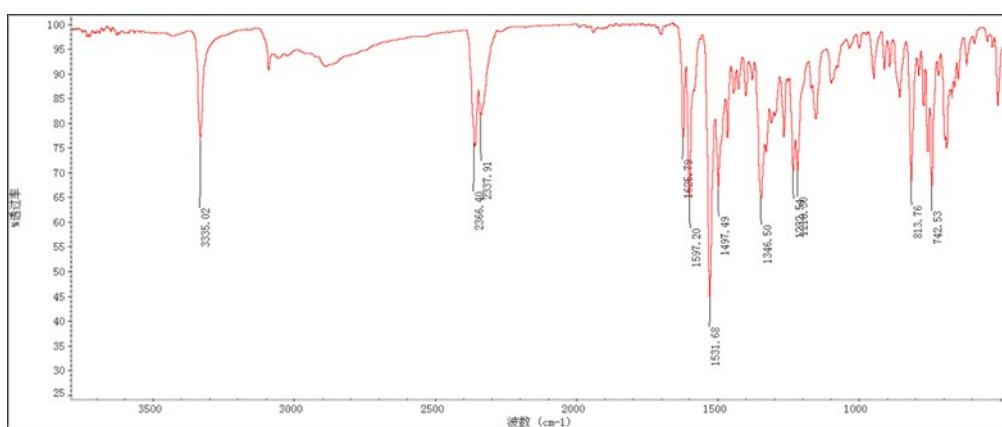

Fig. 9 IR spectrum of 4b

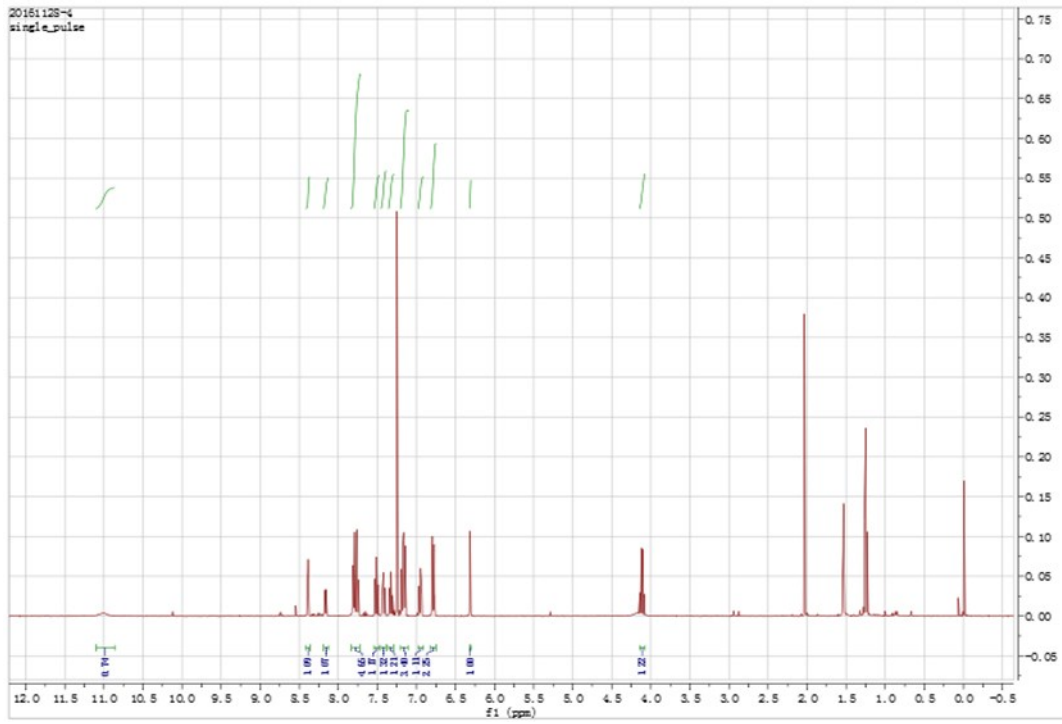

**Fig. 10** <sup>1</sup>H NMR spectrum of 4b

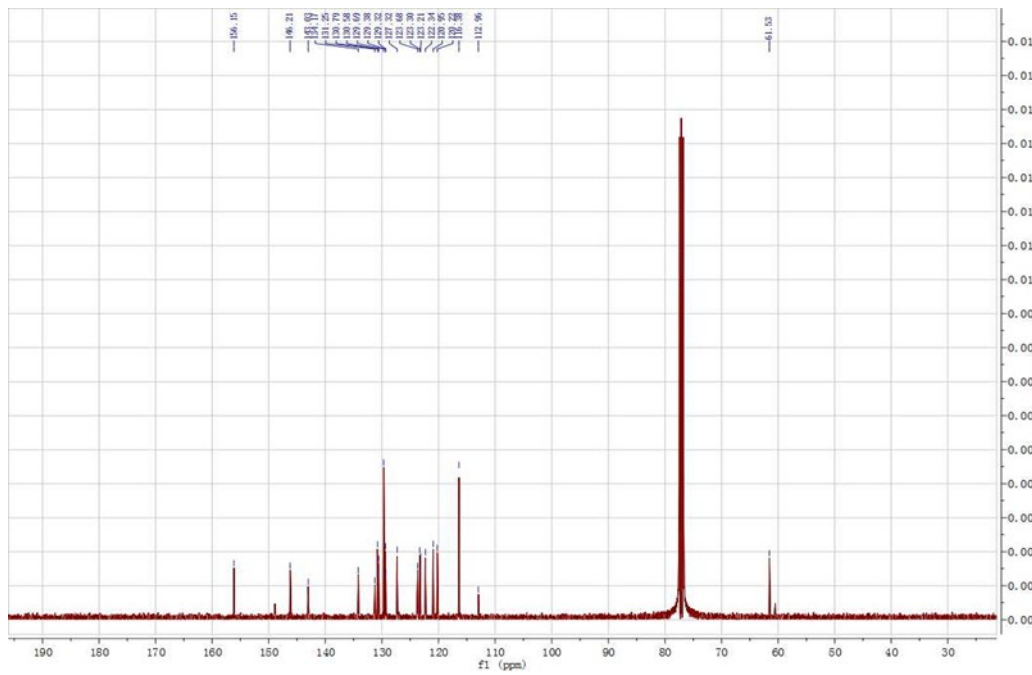

**Fig. 11** <sup>13</sup>C NMR spectrum of 4b

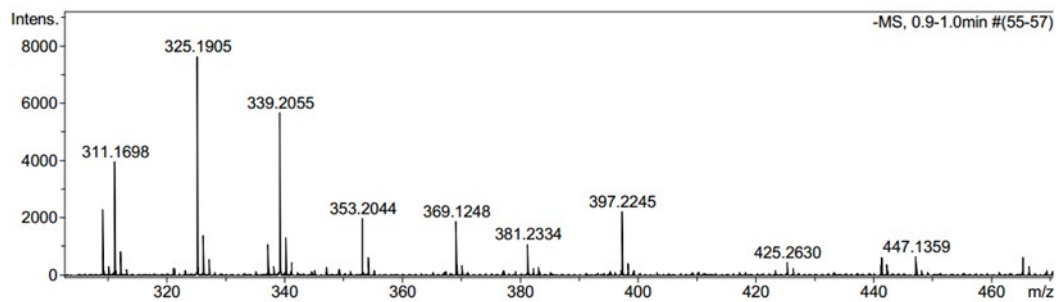

Fig. 12 HRMS spectrum of 4b

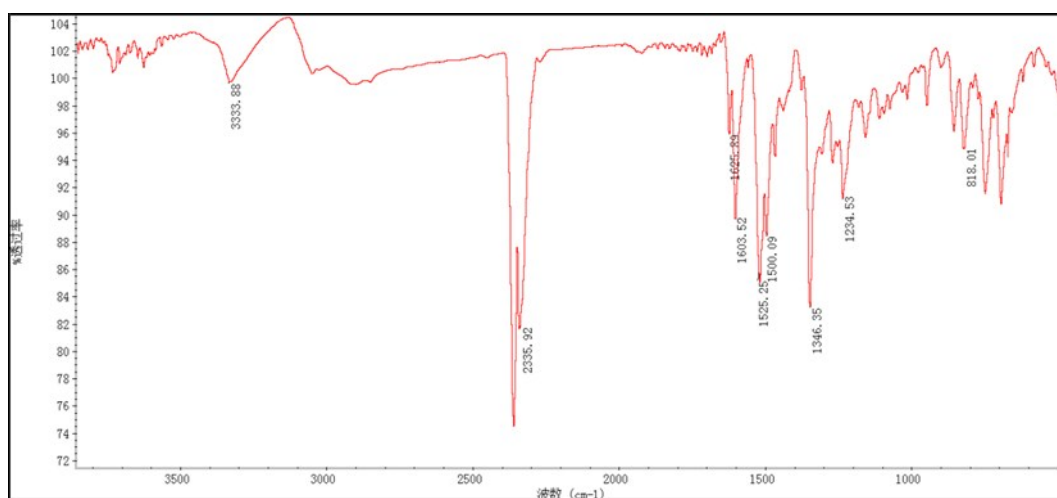

Fig. 13 IR spectrum of 4c

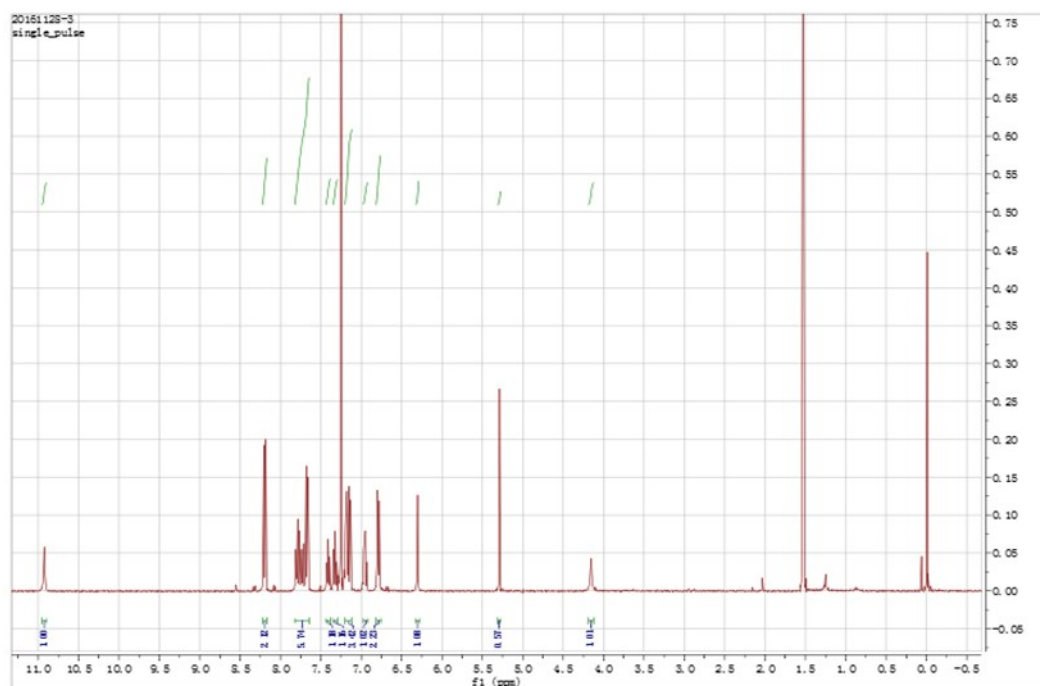

Fig. 14 <sup>1</sup>H NMR spectrum of 4c



Fig. 17 IR spectrum of 4d

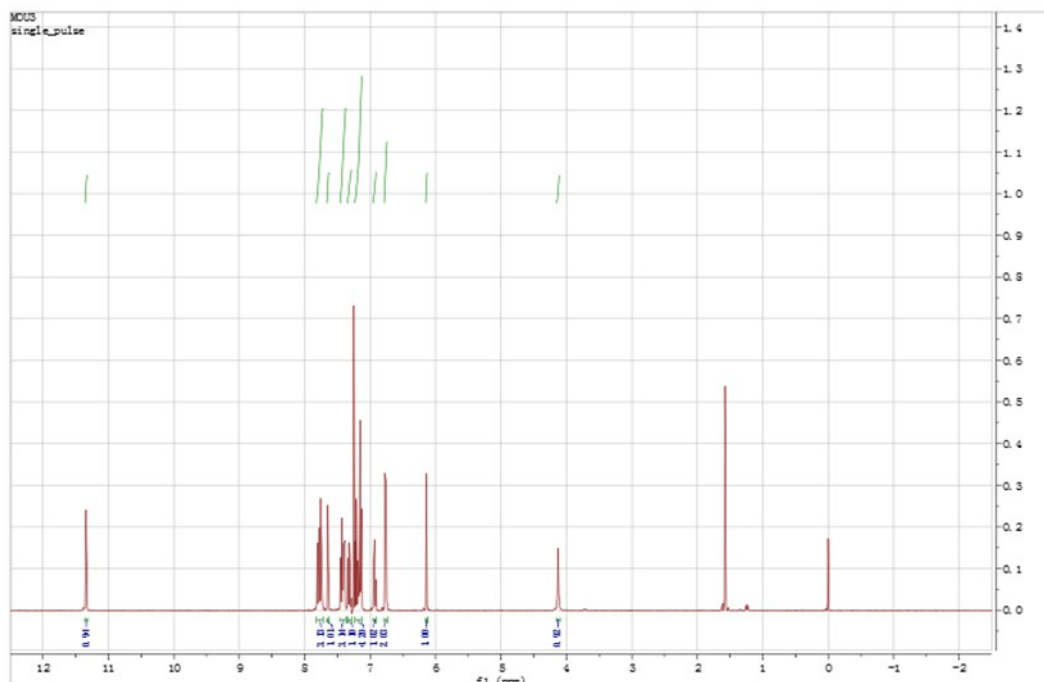

Fig. 18 <sup>1</sup>H NMR spectrum of 4d

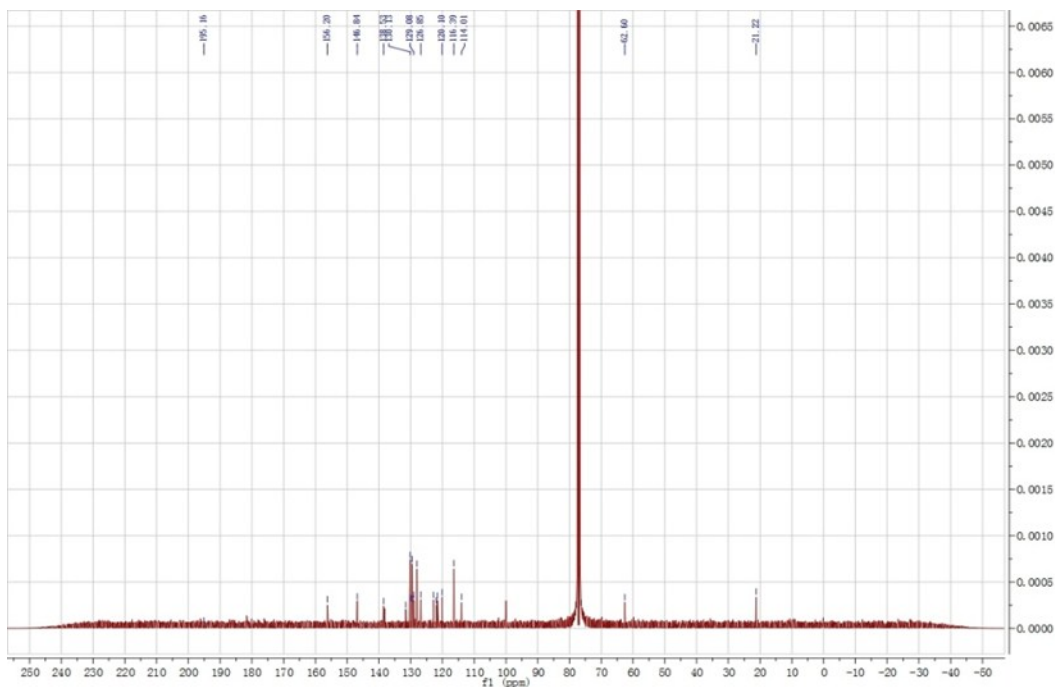

Fig. 19 <sup>13</sup>C NMR spectrum of 4d

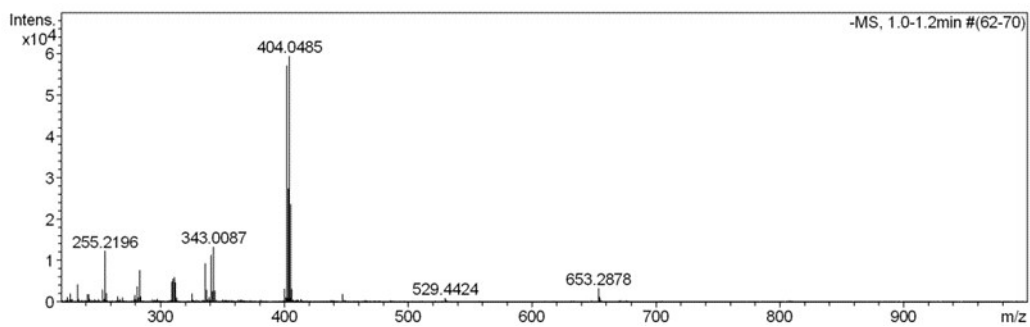

Fig.20 HRMS spectrum of 4d

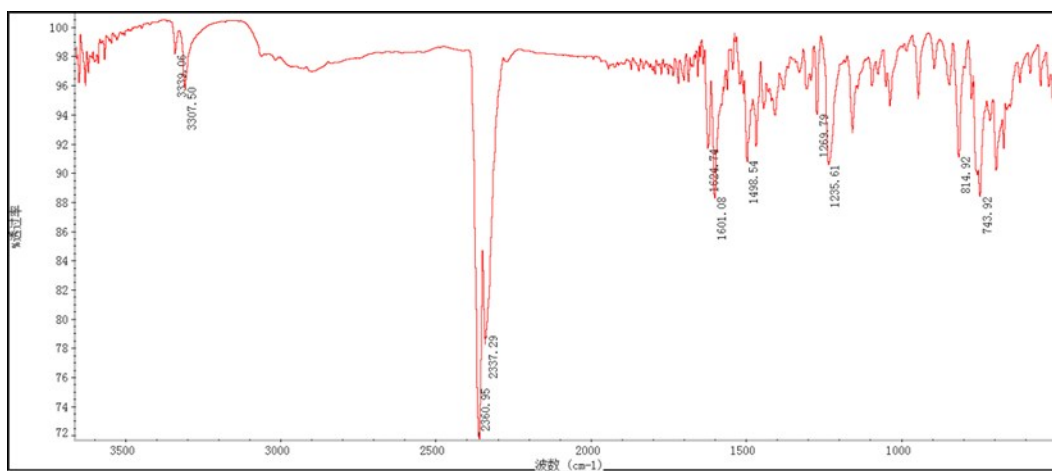

Fig. 21 IR spectrum of 4e

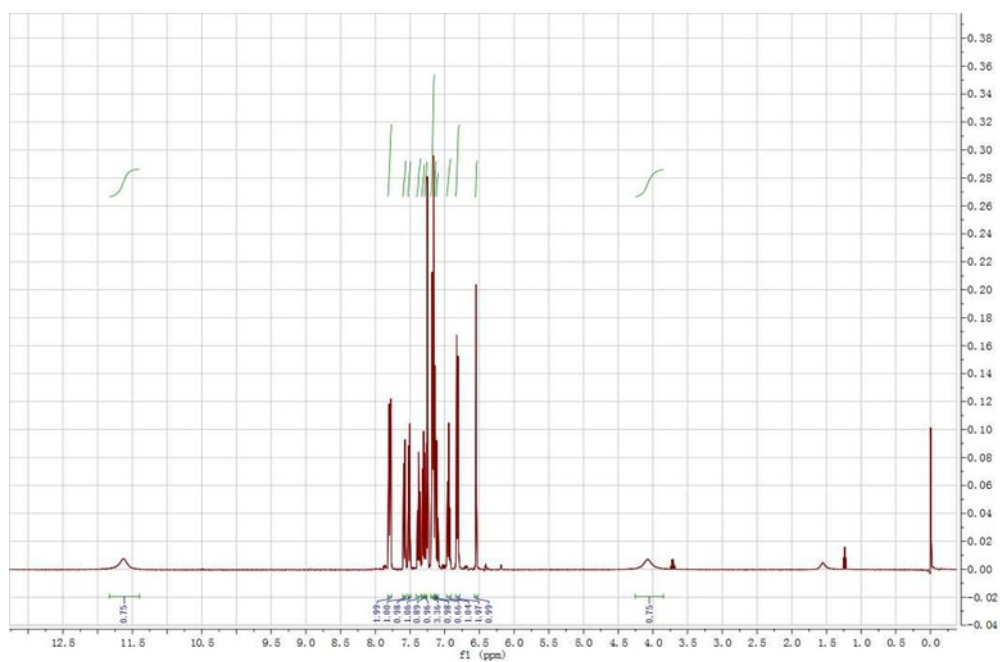

Fig. 22 <sup>1</sup>H NMR spectrum of 4e

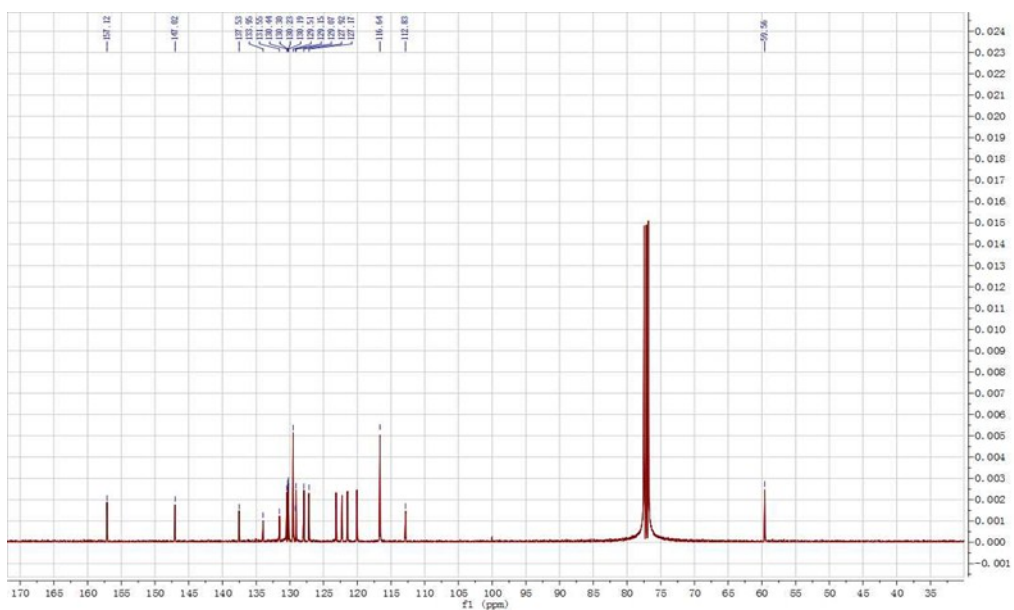

Fig. 23  $^{13}\text{C}$  NMR spectrum of 4e

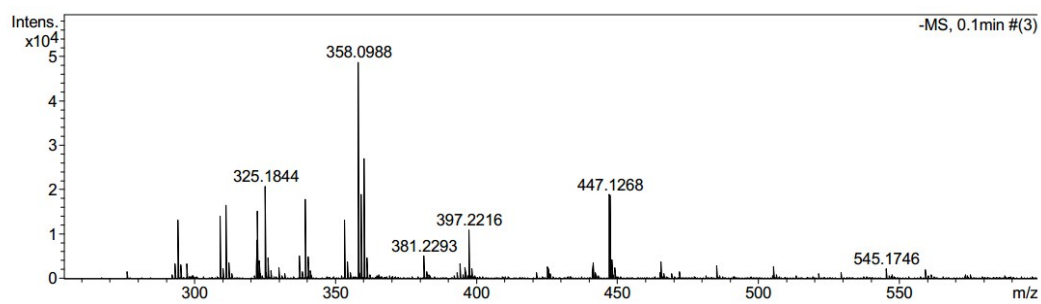

Fig. 24 HRMS spectrum of 4e

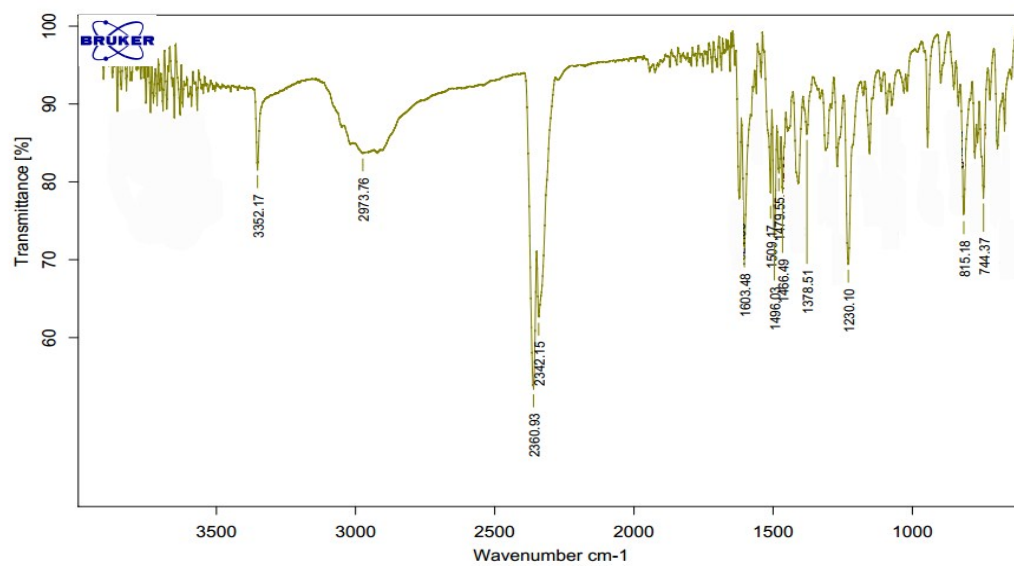



Fig. 25 IR spectrum of 4f

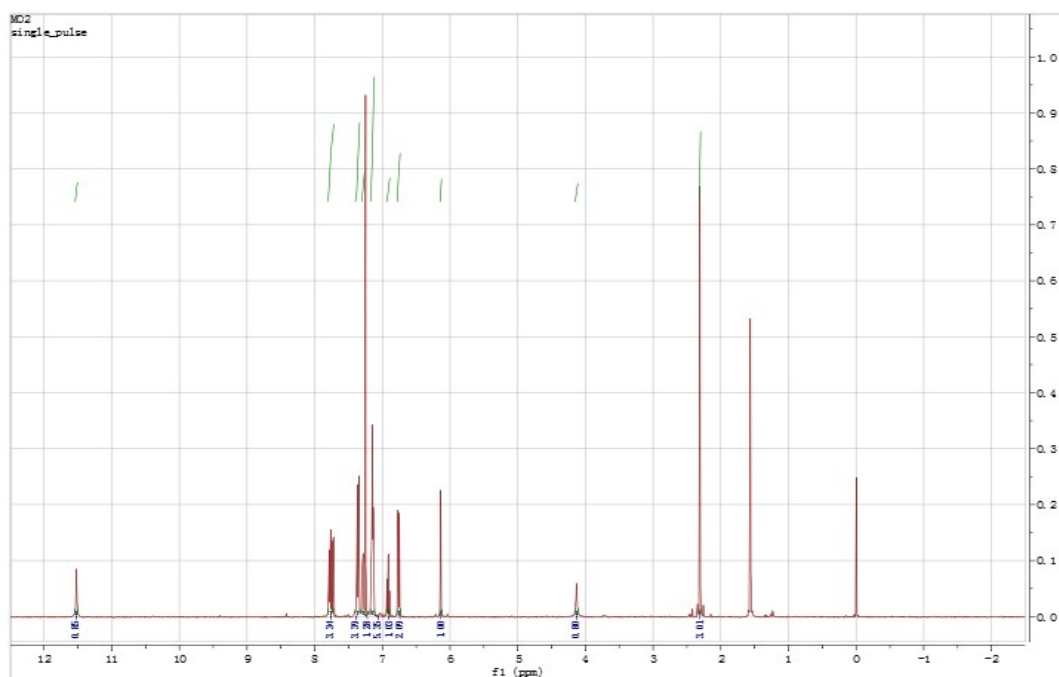

Fig. 26 <sup>1</sup>H NMR spectrum of 4f

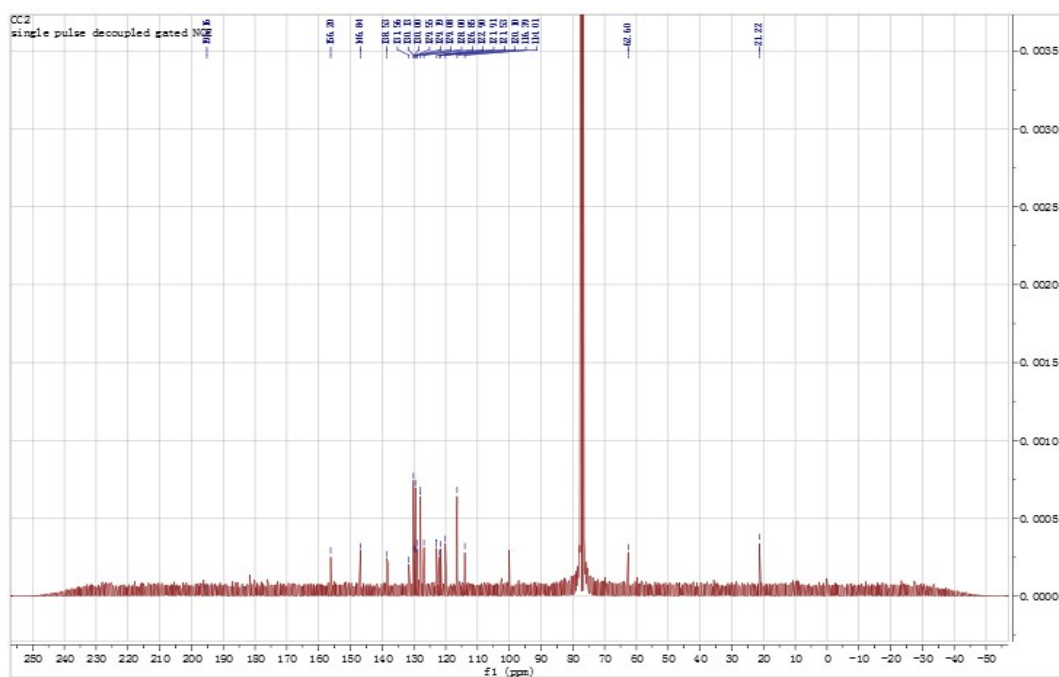

Fig. 27 <sup>13</sup>C NMR spectrum of 4f

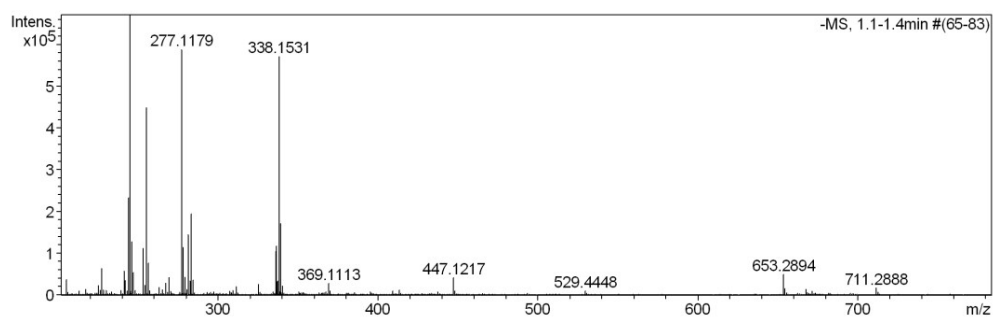

Fig. 28 HRMS spectrum of 4f

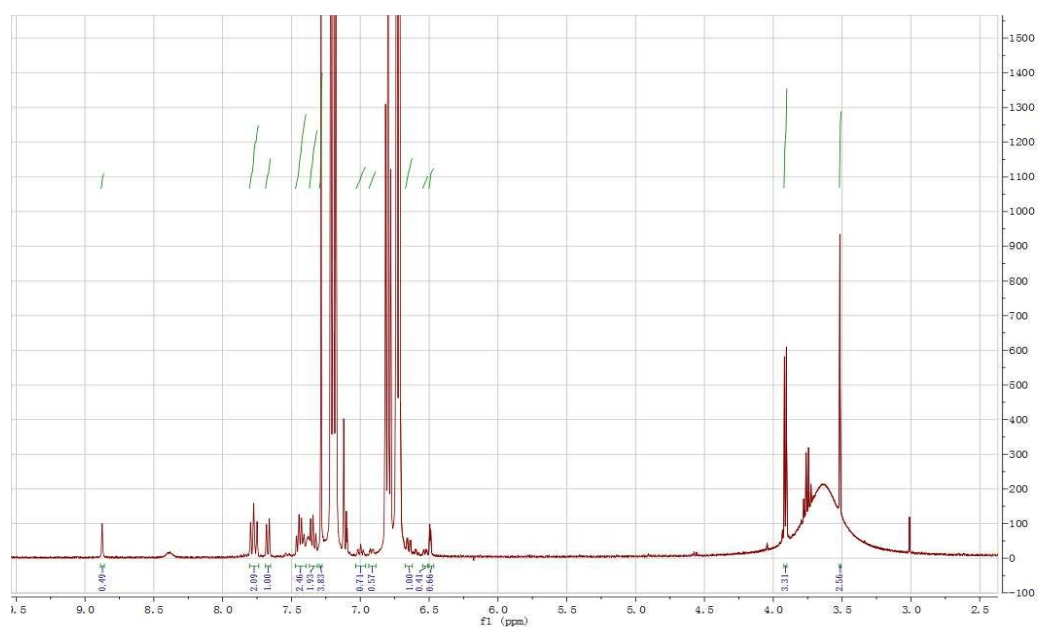

Fig. 29 <sup>1</sup>H NMR spectrum of 4g

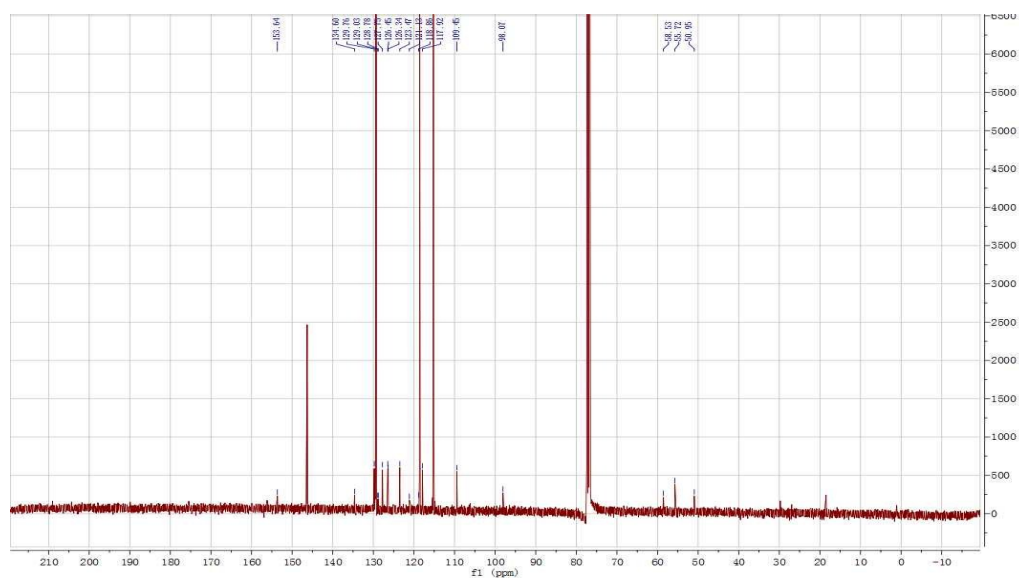

Fig. 30 <sup>13</sup>C NMR spectrum of 4g

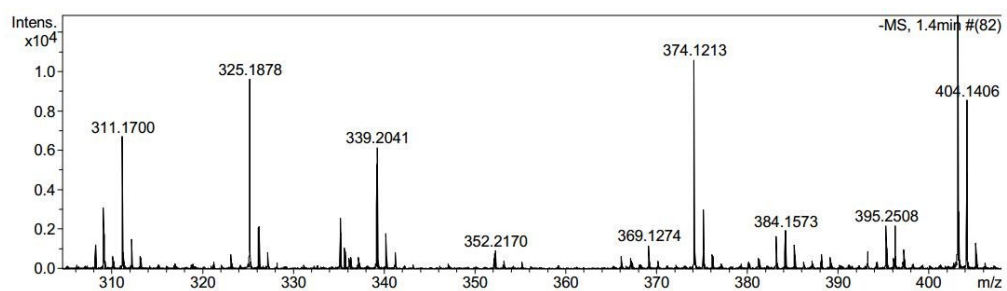

Fig. 31 HRMS spectrum of 4g

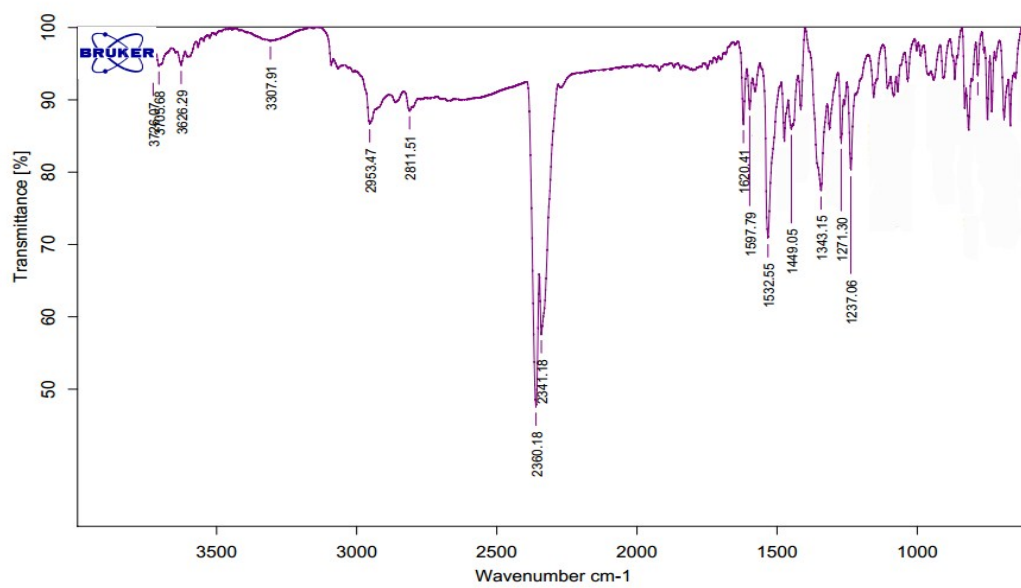

Fig. 32 IR spectrum of 4h

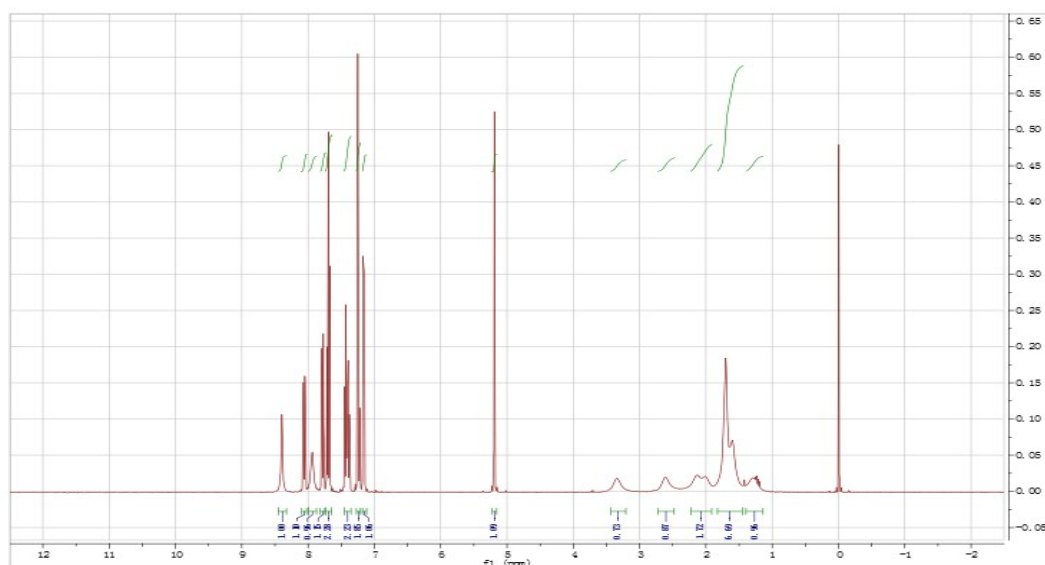

Fig. 33 <sup>1</sup>H NMR spectrum of 4h

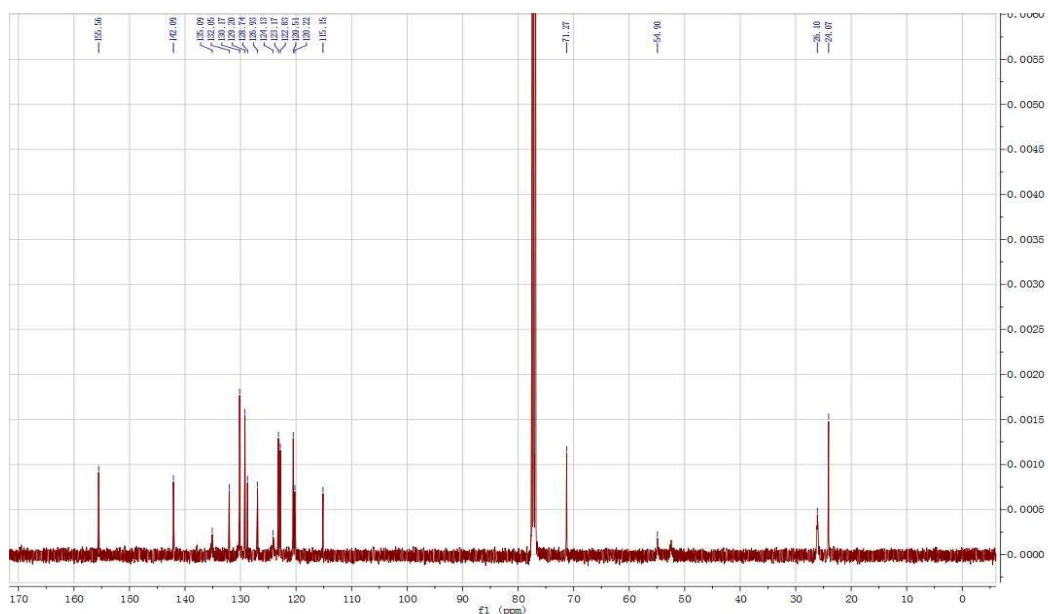

Fig. 34 <sup>13</sup>C NMR spectrum of 4h

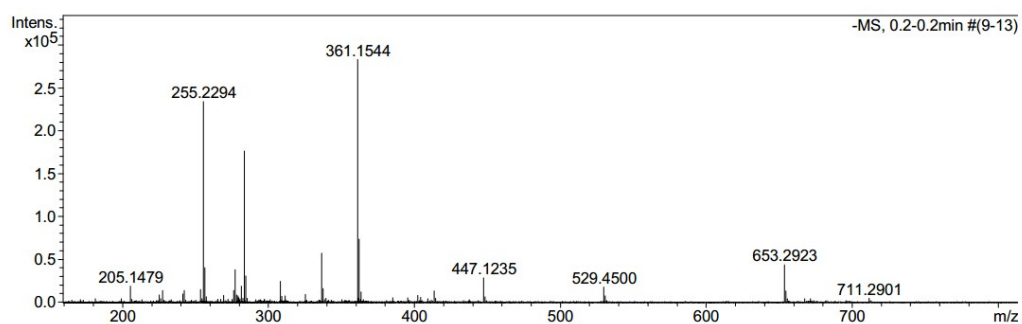

Fig. 35 HRMS spectrum of 4h

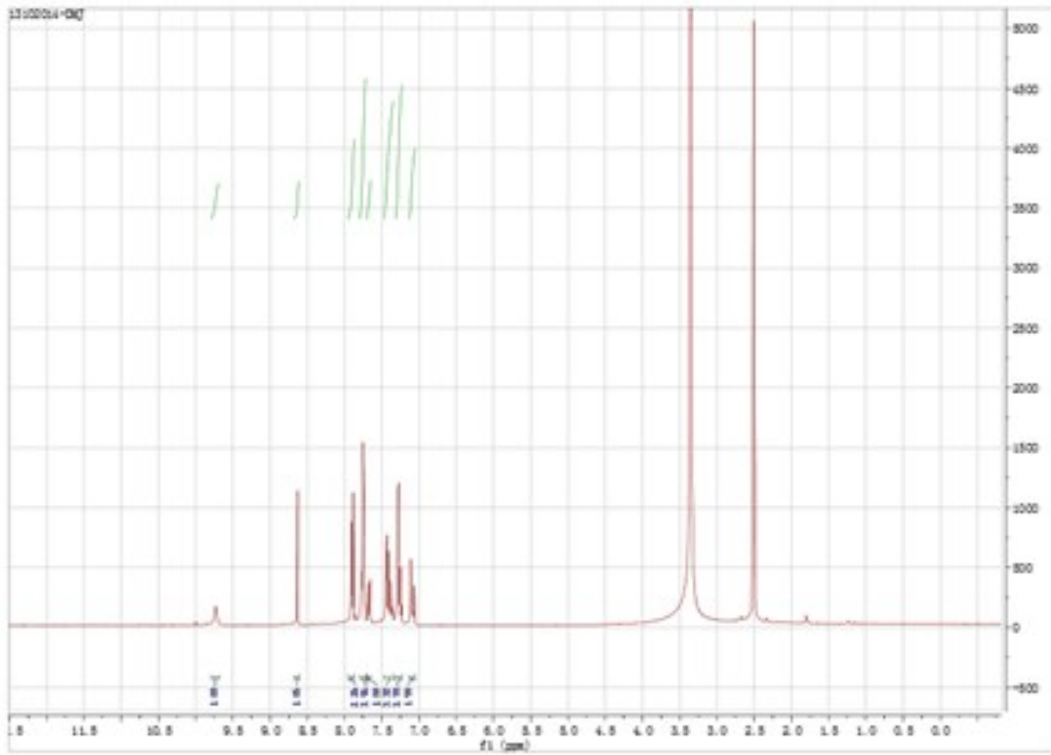

Fig. 36  $^1\text{H}$  NMR spectrum of 4i

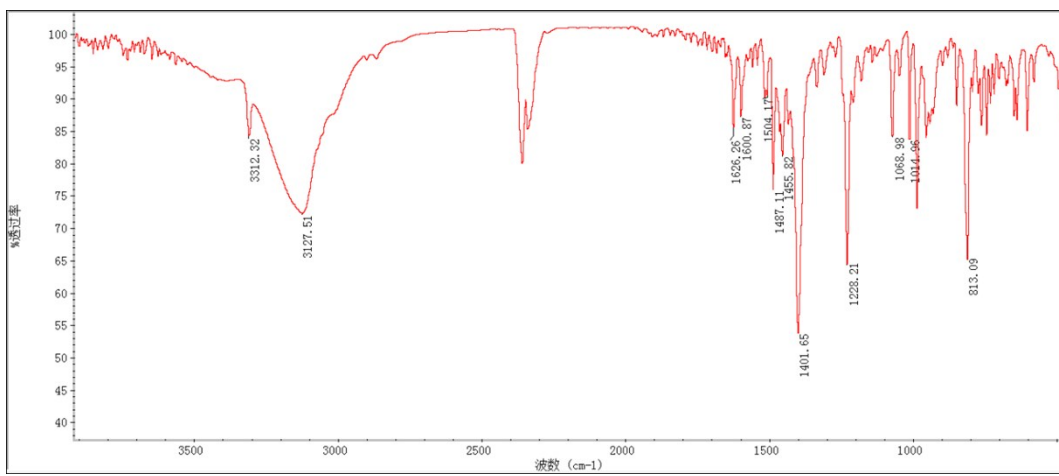

Fig. 37 IR spectrum of 4j

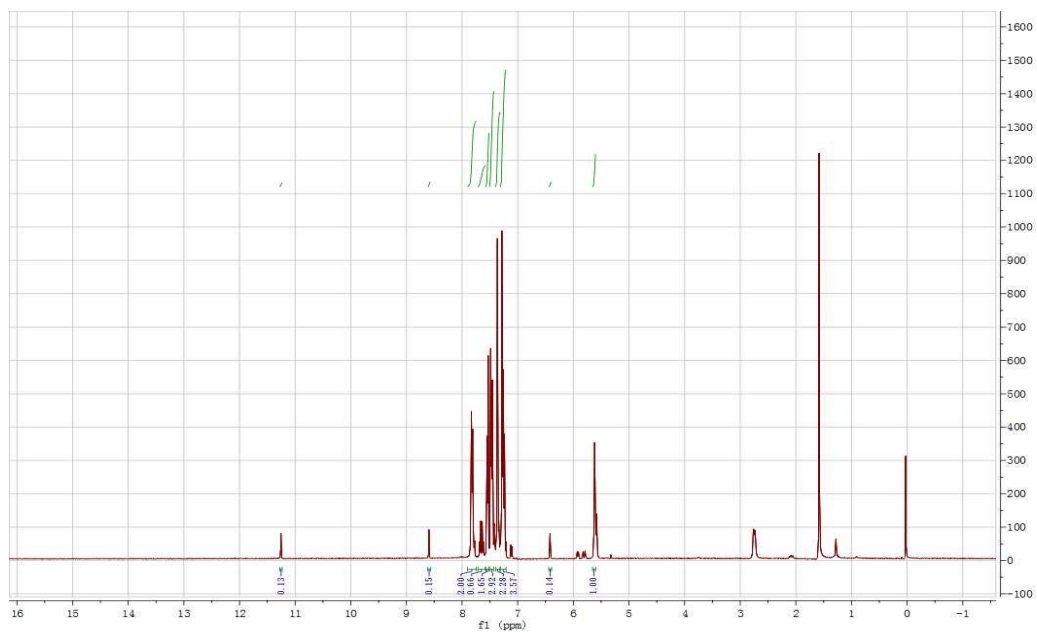

Fig.38  $^1\text{H}$  NMR spectrum of 4j

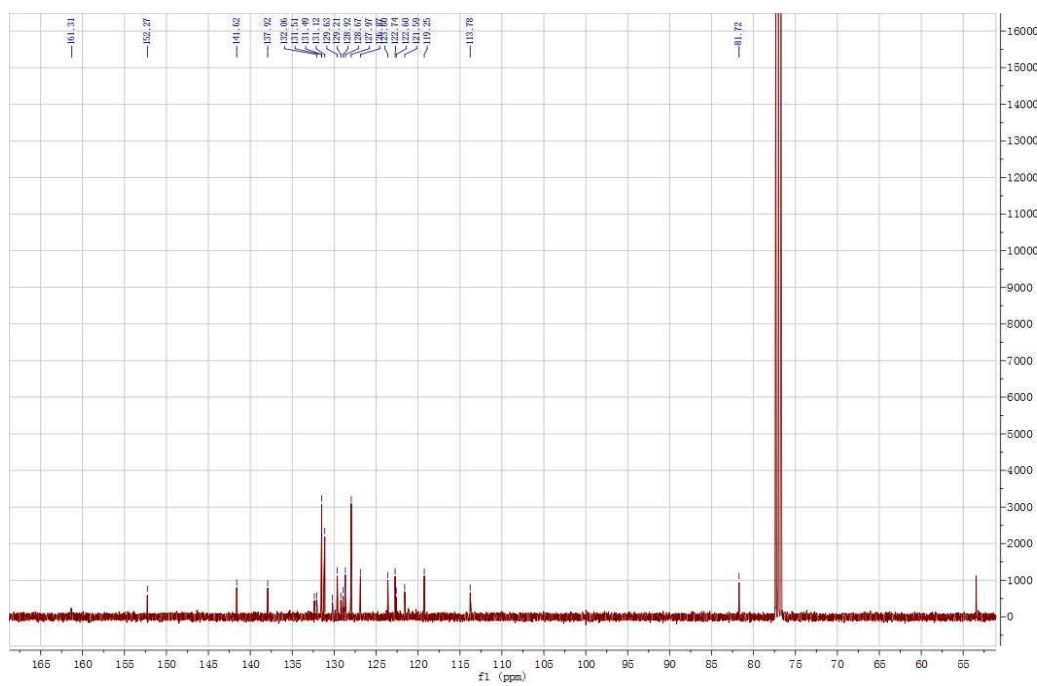

Fig. 39  $^{13}\text{C}$  NMR spectrum of 4j

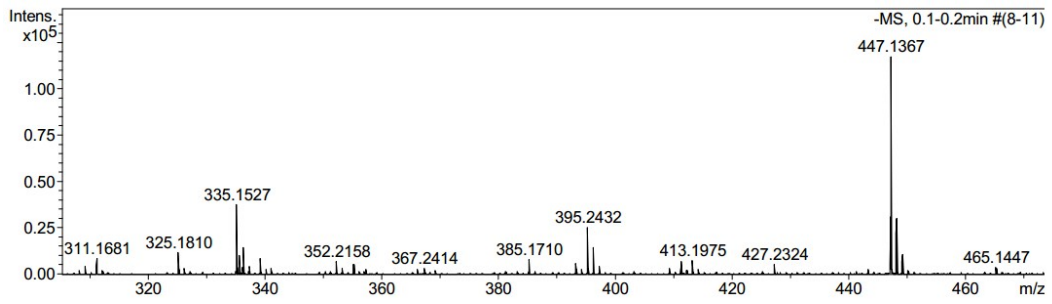

Fig. 40 HRMS spectrum of 4j

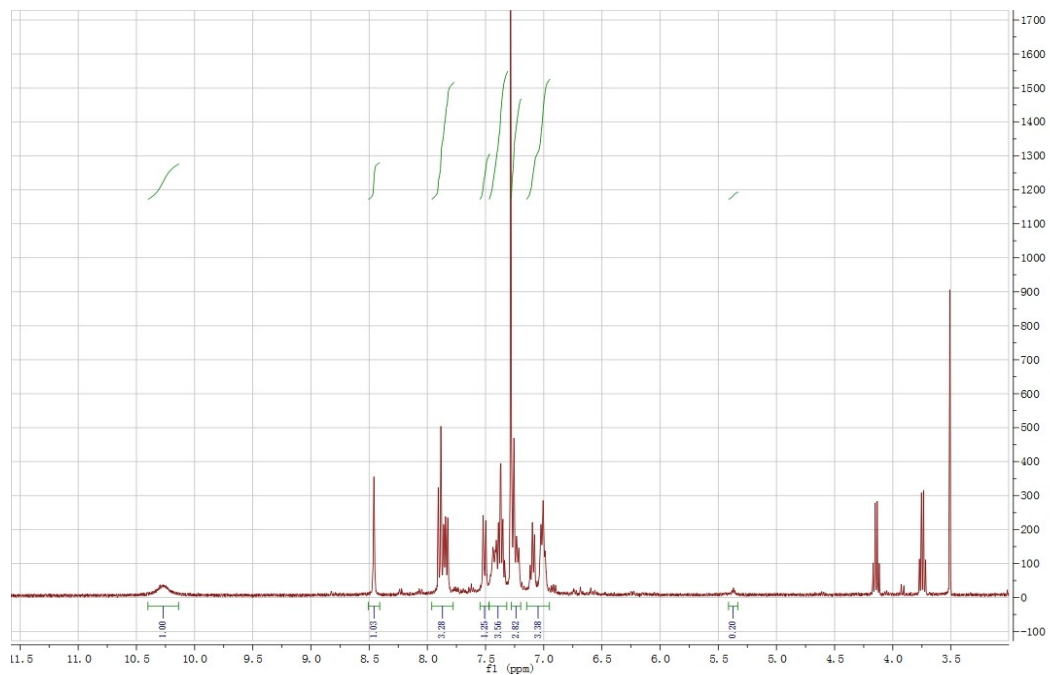

Fig. 41 <sup>1</sup>H NMR spectrum of 4k

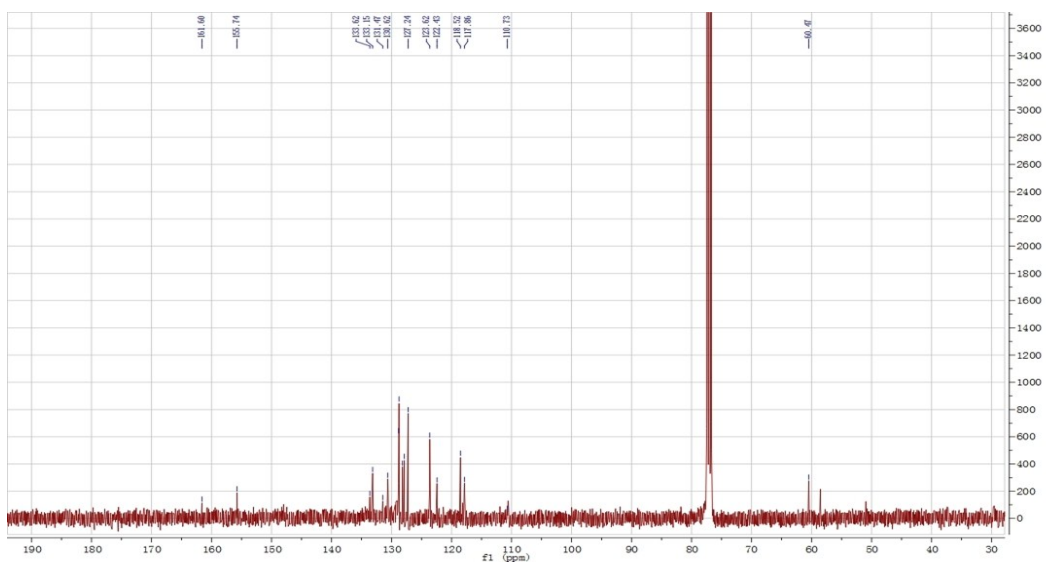

Fig. 42 <sup>13</sup>C NMR spectrum of 4k

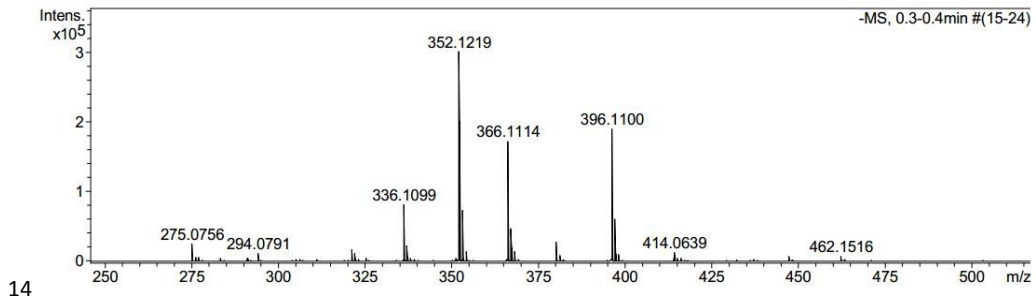

Fig. 43 HRMS spectrum of 4k

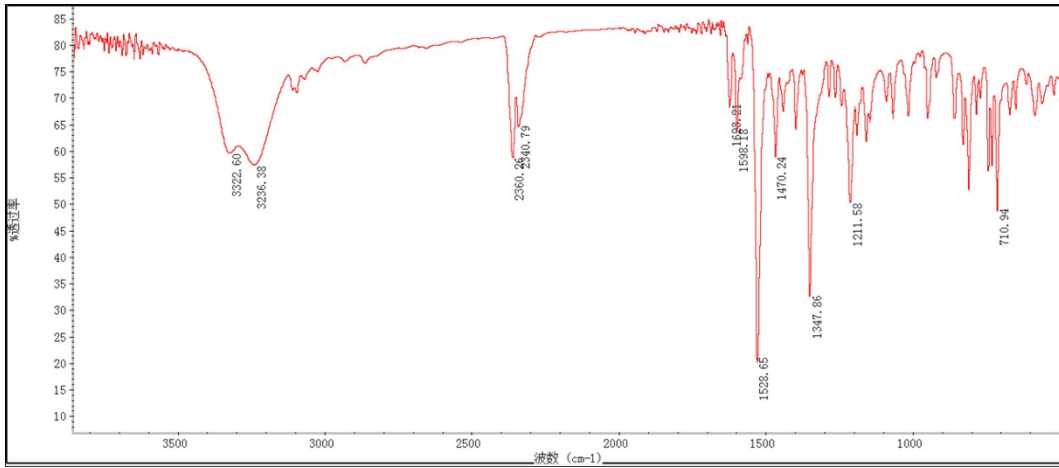

Fig.44 IR spectrum of 4l

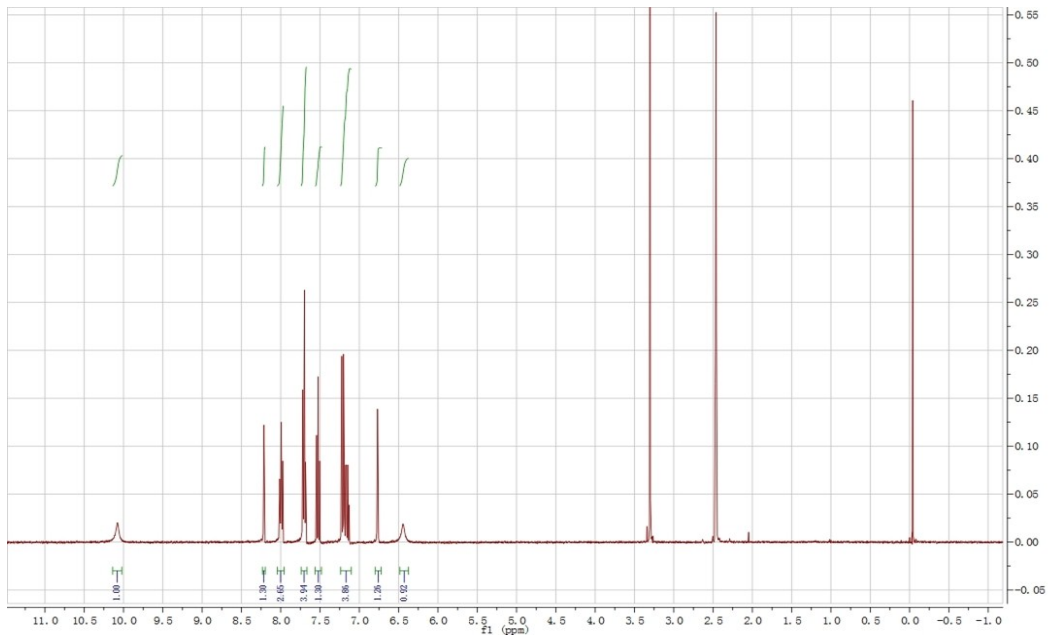

Fig. 45 <sup>1</sup>H NMR spectrum of 4l



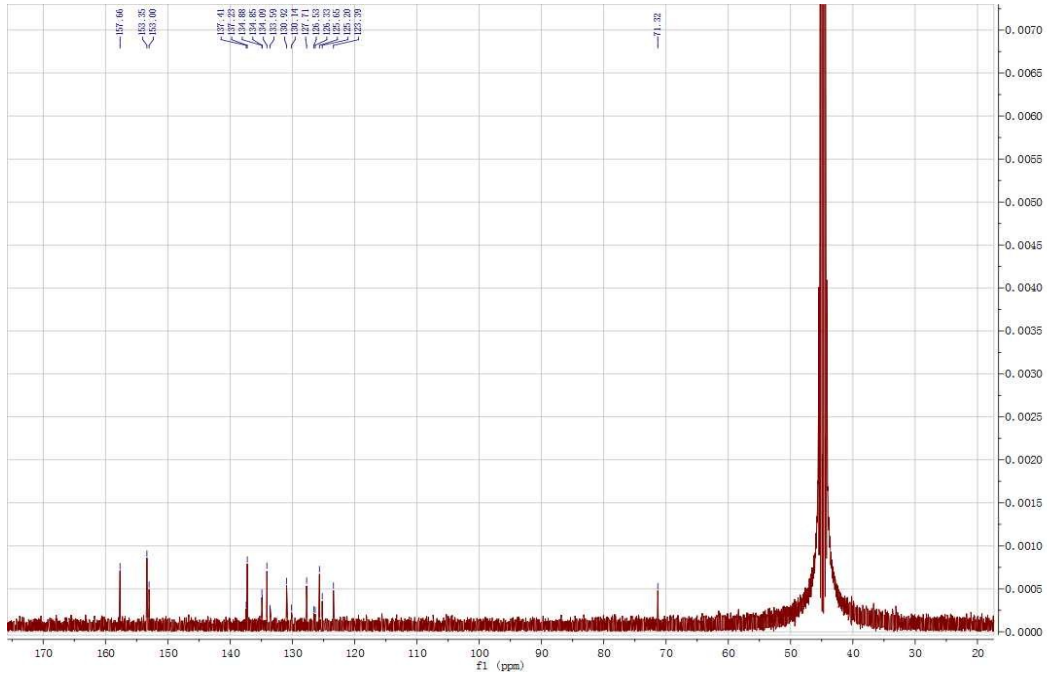

Fig. 46  $^{13}\text{C}$  NMR spectrum of 4l

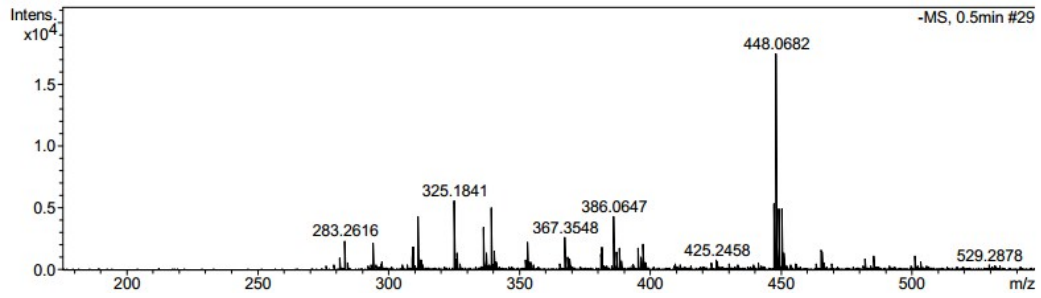

Fig.47 HRMS spectrum of 4l

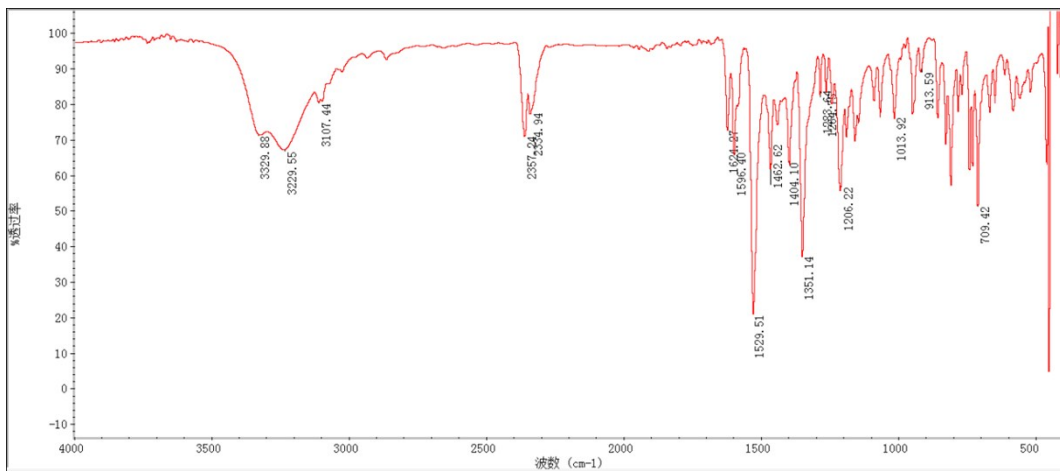

Fig. 48 IR spectrum of 4m

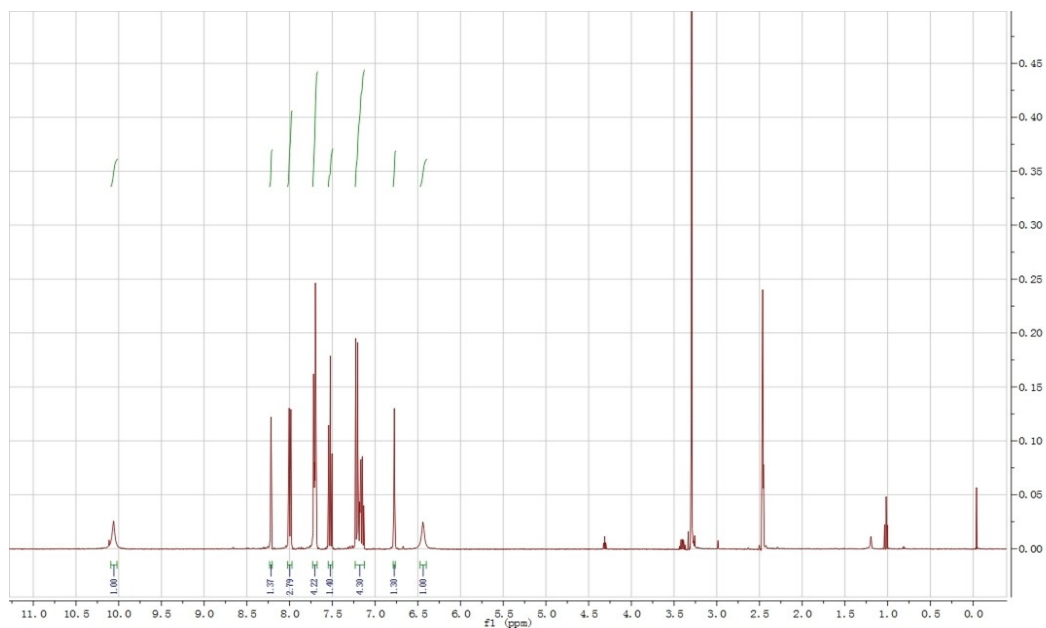

Fig. 49  $^1\text{H}$  NMR spectrum of 4m

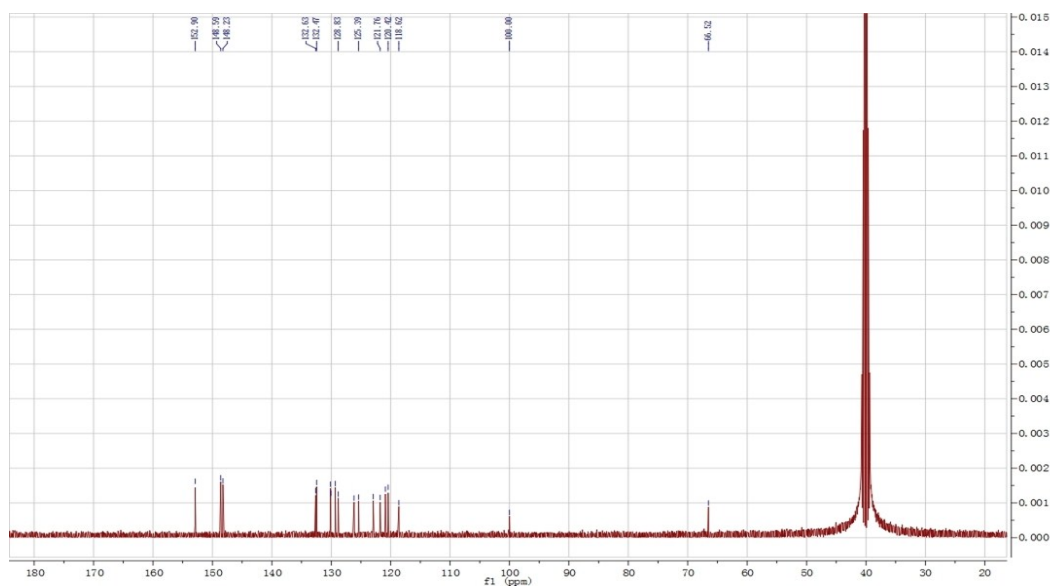

Fig. 50  $^{13}\text{C}$  NMR spectrum of 4m

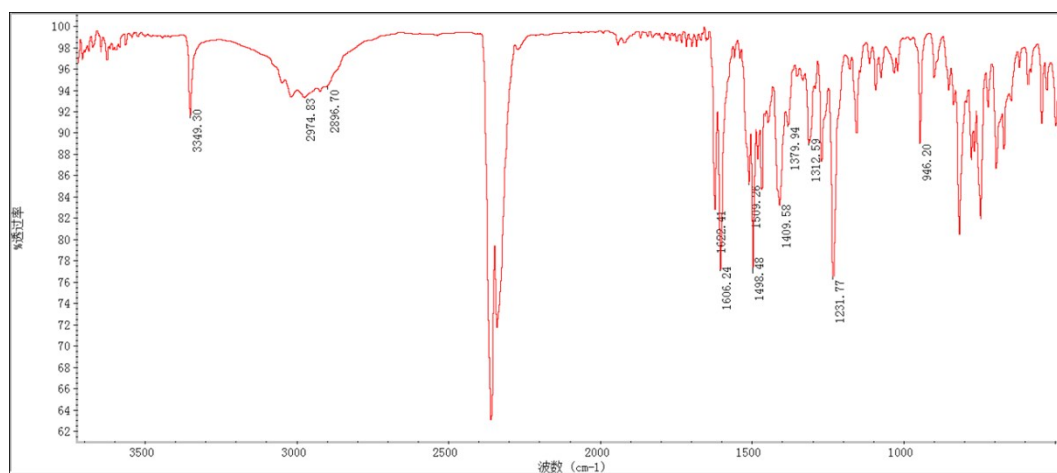

Fig. 51 IR spectrum of 4n

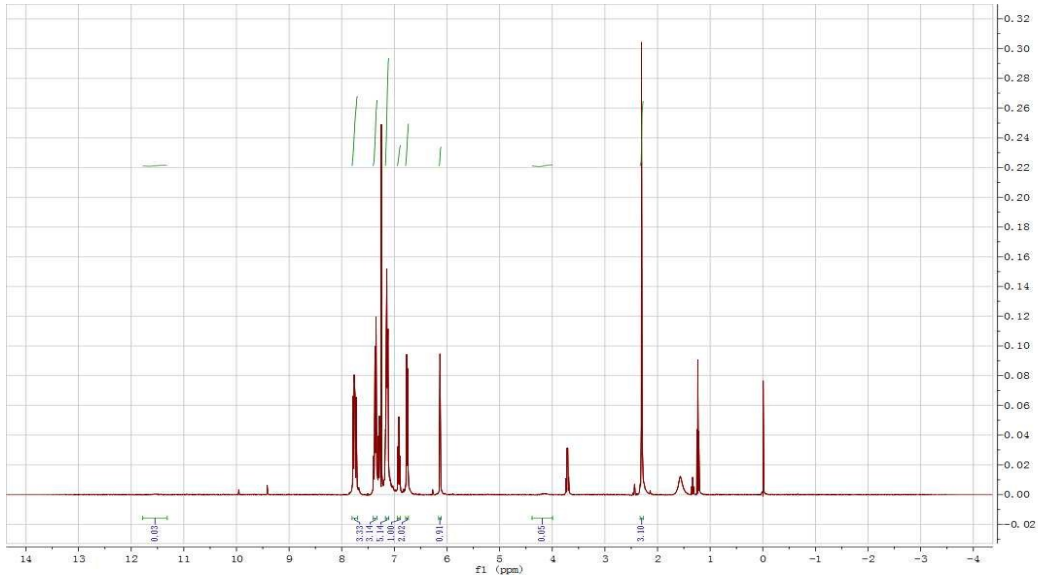

Fig. 52  $^1\text{H}$  NMR spectrum of 4n

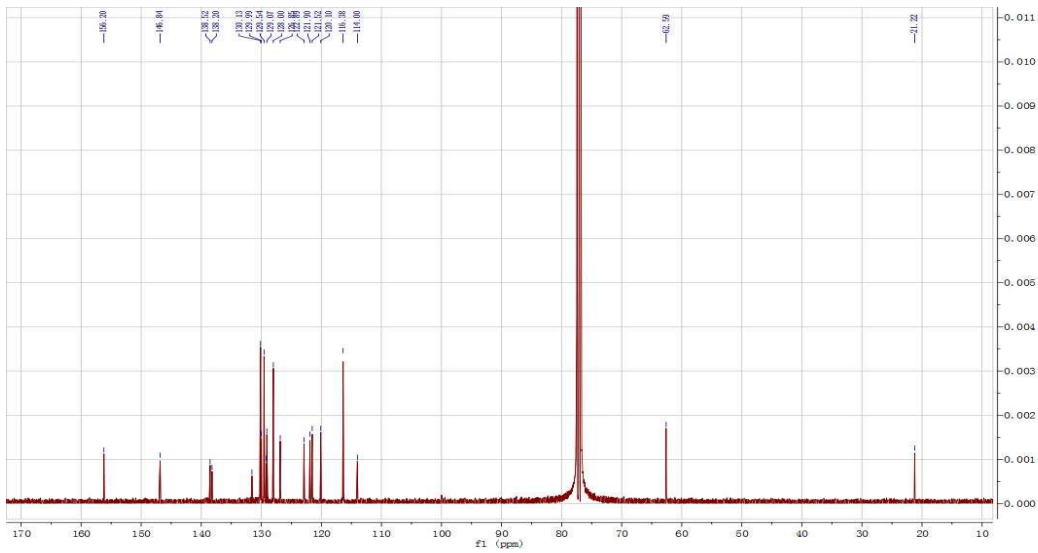

Fig. 53  $^{13}\text{C}$  NMR spectrum of 4n

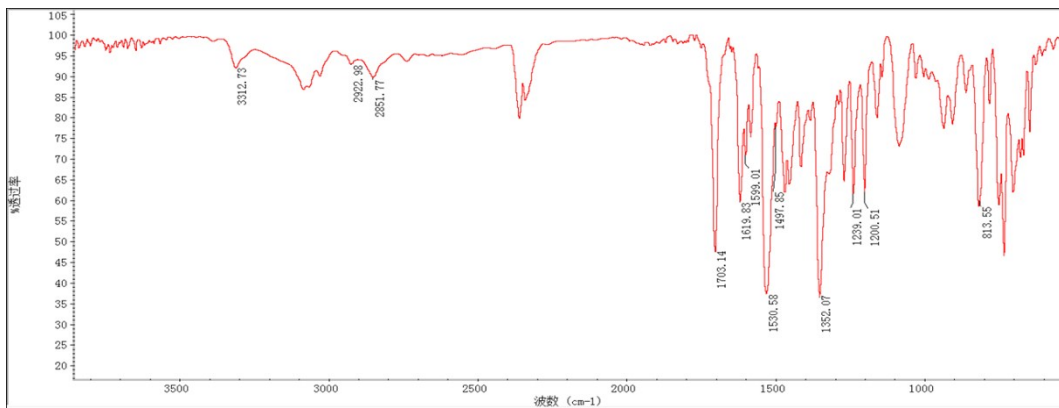

Fig. 54 IR spectrum of 4o

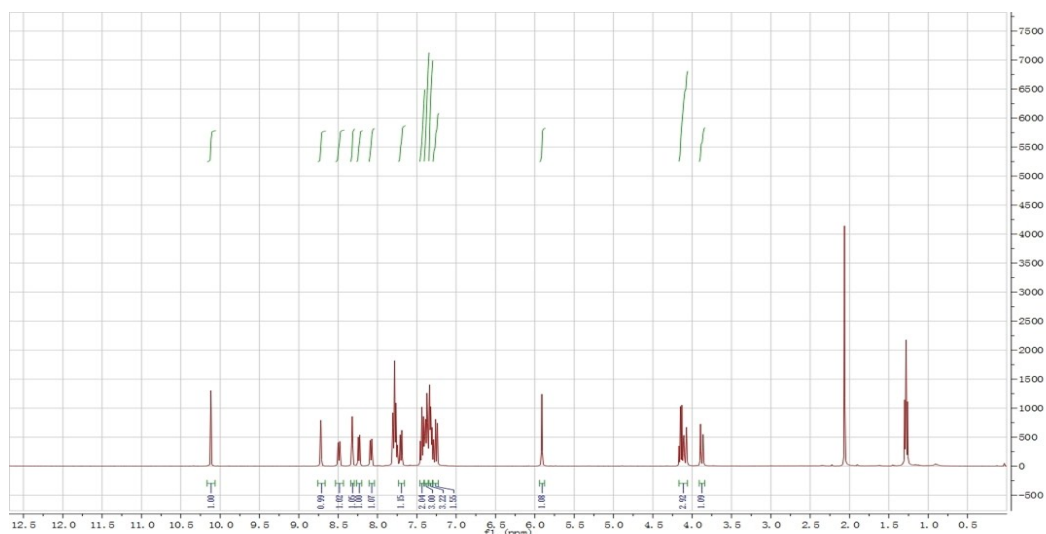

Fig.55 <sup>1</sup>H NMR spectrum of 4o

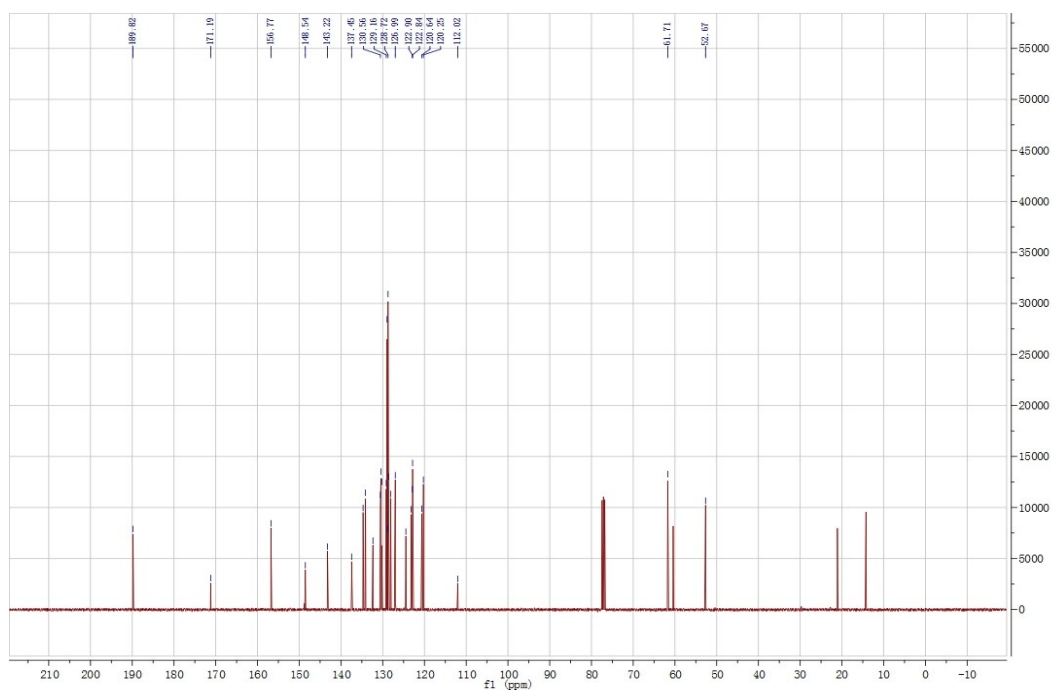

Fig. 56 <sup>13</sup>C NMR spectrum of 4o

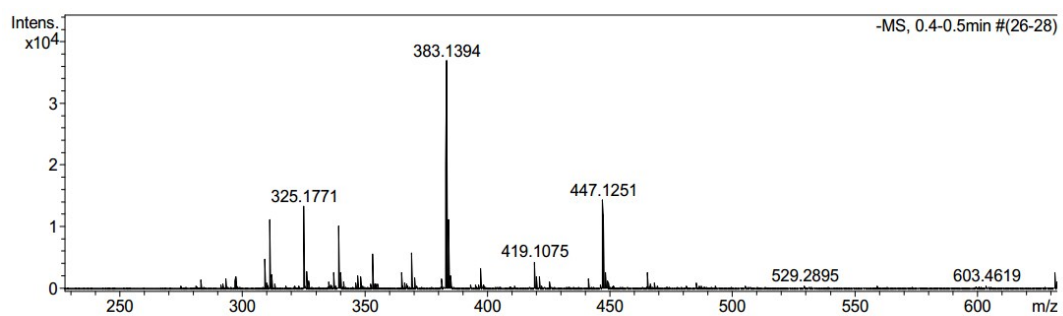

**Fig. 57** HRMS spectrum of 4o

#### 4. References

1. Mahato S, Haldar S, Jana CK. *Chemical Communications*. 2013, **50**, 332.
2. Hashemi H, Sardarian AR. *Journal of the Iranian Chemical Society*. 2013, **10**, 745.
2. Zhang P, Zhang ZH. *Monatshefte für Chemie - Chemical Monthly*. 2009, **140**, 199.
3. Ghorbani-Choghamarani A, Rashidimoghadam S. *Research on Chemical Intermediates*. 2015, **41**, 6271.
